# Supplementary material for: A Genomic Analysis of the Bacillus Bacteriophage Kirovirus kirovense Kirov and Its Ability to Preserve Milk
Source: MDPI journal article supplement (doi:10.3390/ijms241612584), 2023-08-09
Supplement: s1 [file s1]

# **A genomic analysis of the *Bacillus cereus* bacteriophage *Kirovirus kirovense* Kirov and its ability to preserve milk.**

**Olesya A. Kazantseva<sup>1,†,\*</sup>, Anna V. Skorynina<sup>1,†</sup>, Emma G. Pilgrimova<sup>1</sup>, Natalya A. Ryabova<sup>1,2</sup> and Andrey M. Shadrin<sup>1,\*</sup>**

<sup>1</sup> G.K. Skryabin Institute of Biochemistry and Physiology of Microorganisms, Pushchino Scientific Center for Biological Research of the Russian Academy of Sciences, Federal Research Center, Prospect Nauki, 5, 142290 Pushchino, Russia

<sup>2</sup> Institute of Protein Research RAS, Institutskaya st., 4, 142290 Pushchino, Russia

\* Correspondence: [olesyakazantseva@bk.ru](mailto:olesyakazantseva@bk.ru) (O.A.K.); [andrey2010s@gmail.com](mailto:andrey2010s@gmail.com) (A.M.S.).

† These authors contributed equally to this work.

## **Supplementary Materials:**

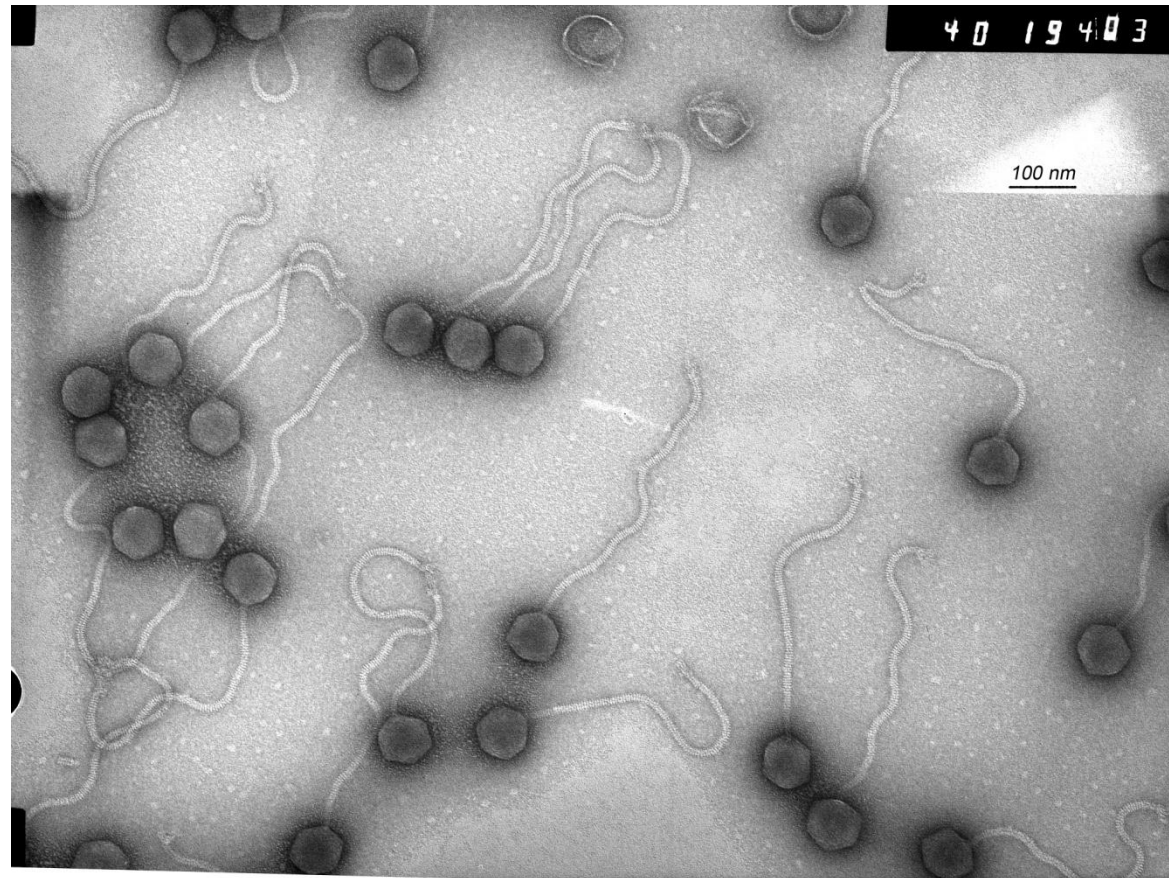

Figure S1. Transmission electron microscopy of *Bacillus* phage *Kirovirus kirovense* Kirov. This is the original TEM micrograph used to generate Figure 1 in the main text. The image was taken using a JEM-100 (JEOL, Japan) transmission electron microscope at 80 kV accelerating voltage on Kodak film SO-163 (Kodak, Cat. # 74144, Hatfield, PA, USA).

Table S1. Primers used to locate the genome ends of *Kirovirus kirovense* Kirov.

| Purpose                               | Primer name | Primer sequence (5'-3')                 | №PCR   | Template                                        |
|---------------------------------------|-------------|-----------------------------------------|--------|-------------------------------------------------|
| Determination of the left genome end  | kir1_end3_L | TTATGCTGTCTATTGAGAGGATTA                | I PCR  | genomic DNA of Kirov after DNA tailing reaction |
|                                       | AncherdT16V | GACCACGCGTATCGATGTCGACTTTTTTTTTTTTTTTTV |        |                                                 |
|                                       | kir1_end2_L | CTGAGTGGTCGGGTTGTAG                     | II PCR | I PCR product                                   |
|                                       | Anch        | GACCACGCGTATCGATGTCGAC                  |        |                                                 |
| Determination of the right genome end | kir1_end4_R | CCAAATGGTATGAGTTGGGTTA                  | I PCR  | genomic DNA of Kirov after DNA tailing reaction |
|                                       | AncherdT16V | GACCACGCGTATCGATGTCGACTTTTTTTTTTTTTTTTV |        |                                                 |
|                                       | kir1_end5_R | TGGTGTATTATTGCGGTGTTTA                  | II PCR | I PCR product                                   |
|                                       | Anch        | GACCACGCGTATCGATGTCGAC                  |        |                                                 |

Table S2. The host range of *Bacillus* phage *Kirovirus kirovense* Kirov determined on 42 *Bacillus* strains.

| No. | Organism         | Strain                 | Source | Phage lysis | No | Organism                     | Strain      | Source                      | Phage lysis |
|-----|------------------|------------------------|--------|-------------|----|------------------------------|-------------|-----------------------------|-------------|
| 1   | <i>B. cereus</i> | VKM B-13               | VKM    | +           | 22 | <i>B. cereus</i>             | ATCC 4342   | ATCC                        | +           |
| 2   | <i>B. cereus</i> | VKM B-15               | VKM    | -           | 23 | <i>B. cereus</i>             | ATCC 14893  | probiotic“Bactis ubtil”[73] | +           |
| 3   | <i>B. cereus</i> | VKM B-370              | VKM    | +           | 24 | <i>B. thuringiensis</i>      | VKM B-83    | VKM                         | +           |
| 4   | <i>B. cereus</i> | VKM B-373              | VKM    | +           | 25 | <i>B. thuringiensis</i>      | VKM B-84    | VKM                         | +           |
| 5   | <i>B. cereus</i> | VKM B-374              | VKM    | -           | 26 | <i>B. thuringiensis</i>      | VKM B-85    | VKM                         | +           |
| 6   | <i>B. cereus</i> | VKM B-383              | VKM    | +           | 27 | <i>B. thuringiensis</i>      | VKM B-440   | VKM                         | -           |
| 7   | <i>B. cereus</i> | VKM B-445              | VKM    | -           | 28 | <i>B. thuringiensis</i>      | VKM B-443   | VKM                         | -           |
| 8   | <i>B. cereus</i> | VKM B-473              | VKM    | -           | 29 | <i>B. thuringiensis</i>      | VKM B-446   | VKM                         | -           |
| 9   | <i>B. cereus</i> | VKM B-491              | VKM    | +           | 30 | <i>B. thuringiensis</i>      | VKM B-447   | VKM                         | -           |
| 10  | <i>B. cereus</i> | VKM B-504 <sup>T</sup> | VKM    | +           | 31 | <i>B. thuringiensis</i>      | VKM B-450   | VKM                         | -           |
| 11  | <i>B. cereus</i> | VKM B-681              | VKM    | -           | 32 | <i>B. thuringiensis</i>      | VKM B-453   | VKM                         | -           |
| 12  | <i>B. cereus</i> | VKM B-682              | VKM    | -           | 33 | <i>B. thuringiensis</i>      | VKM B-454   | VKM                         | -           |
| 13  | <i>B. cereus</i> | VKM B-683              | VKM    | -           | 34 | <i>B. thuringiensis</i>      | VKM B-1555  | VKM                         | -           |
| 14  | <i>B. cereus</i> | VKM B-684              | VKM    | -           | 35 | <i>B. thuringiensis</i>      | VKM B-1557  | VKM                         | -           |
| 15  | <i>B. cereus</i> | VKM B-686              | VKM    | -           | 36 | <i>B. thuringiensis</i>      | ATCC 35646  | ATCC                        | -           |
| 16  | <i>B. cereus</i> | VKM B-687              | VKM    | -           | 37 | <i>B. weihenstephanensis</i> | KBAB4       | [74]                        | -           |
| 17  | <i>B. cereus</i> | VKM B-688              | VKM    | -           | 38 | <i>B. megaterium</i>         | MS941       | MoBiTec                     | -           |
| 18  | <i>B. cereus</i> | VKM B-771              | VKM    | -           | 39 | <i>B. flexus</i>             |             | Laboratory collection       | -           |
| 19  | <i>B. cereus</i> | VKM B-810              | VKM    | -           | 40 | <i>B. subtilis</i>           | 168 His III | Laboratory collection       | -           |
| 20  | <i>B. cereus</i> | VKM B-811              | VKM    | -           | 41 | <i>B. subtilis</i>           | WB 800n     | MoBiTec                     | -           |
| 21  | <i>B. cereus</i> | VKM B-812              | VKM    | +           | 42 | <i>B. pumilus</i>            | AVS-01      | Laboratory collection       | -           |

Source abbreviations: VKM: All-Russian Collection of Microorganisms; ATCC: American Type Culture Collection; MoBiTec: company MoBiTec GmbH, Germany.

Table S3. Annotation of *Bacillus* phage *Kirovirus kirovense* Kirov.

| ORF№ | Start codon | Stop codon | Strand | Blast results                                                                                    |         | Conserved domains, Blast |          | Hhpred results                                                                                                                                                                                                                                                                                                                 | Annotation                                             |
|------|-------------|------------|--------|--------------------------------------------------------------------------------------------------|---------|--------------------------|----------|--------------------------------------------------------------------------------------------------------------------------------------------------------------------------------------------------------------------------------------------------------------------------------------------------------------------------------|--------------------------------------------------------|
|      |             |            |        | Name                                                                                             | E-val   | Name, (region)           | E-val    | (Prob./E-val)                                                                                                                                                                                                                                                                                                                  |                                                        |
| 1    | 916         | 602        | -      | -                                                                                                | -       | -                        | -        | ('-', '-')                                                                                                                                                                                                                                                                                                                     | hp                                                     |
| 2    | 1130        | 933        | -      | hp                                                                                               | hp      | -                        | -        | PF06925.12; MGDG_synth;<br>Monogalactosyldiacylglycerol (MGDG)<br>synthase (62.91/5.70e+00)                                                                                                                                                                                                                                    | hp                                                     |
| 3    | 1503        | 1117       | -      | hp                                                                                               | hp      | -                        | -        | ('-', '-')                                                                                                                                                                                                                                                                                                                     | hp                                                     |
| 4    | 1781        | 1503       | -      | hp                                                                                               | hp      | -                        | -        | KOG1597; Transcription initiation factor<br>TFIIB [Transcription](95.61/1.20e-02)<br><br>d1nuia2; g.41.3.2 (A:10-63) Zinc-binding<br>domain of primase-helicase<br>{Bacteriophage T7 [TaxId: 10760]}<br>(95.16/2.60e-02)<br><br>PF11781.9; zf-RRN7; Zinc-finger of<br>RNA-polymerase I-specific TFIIB,<br>Rrn7(94.23/3.70e-02) | Zinc-binding domain<br>containing protein              |
| 5    | 2016        | 1822       | -      | hp                                                                                               | hp      | -                        | -        | ('-', '-')                                                                                                                                                                                                                                                                                                                     | hp                                                     |
| 6    | 2224        | 2009       | -      | hp                                                                                               | hp      | -                        | -        | ('-', '-')                                                                                                                                                                                                                                                                                                                     | hp                                                     |
| 7    | 2604        | 2224       | -      | Phage protein (N4<br>Gp49/phage Sf6 gene 66)<br>family [uncultured<br><i>Caudovirales</i> phage] | 1.0e-08 | Phage_gp49_66<br>(26-81) | 7.09e-14 | PF13876.7; Phage_gp49_66; Phage<br>protein (N4 Gp49/phage Sf6 gene 66)<br>family (99.97/1.10e-30)                                                                                                                                                                                                                              | phage protein (N4<br>Gp49/phage Sf6 gene<br>66) family |

|    |      |      |   |                                                                                         |                        |                                         |                           |                                                                                                                                                                                                                                                                                                     |                        |
|----|------|------|---|-----------------------------------------------------------------------------------------|------------------------|-----------------------------------------|---------------------------|-----------------------------------------------------------------------------------------------------------------------------------------------------------------------------------------------------------------------------------------------------------------------------------------------------|------------------------|
|    |      |      |   | Phage protein (N4 Gp49/phage Sf6 gene 66) family [uncultured <i>Caudovirales</i> phage] | 2.0e-08                |                                         |                           |                                                                                                                                                                                                                                                                                                     |                        |
|    |      |      |   | Sf6 protein [ <i>Podoviridae</i> sp. ctda_1]                                            | 7.0e-08                |                                         |                           |                                                                                                                                                                                                                                                                                                     |                        |
| 8  | 2842 | 2597 | - | -                                                                                       | -                      | -                                       | -                         | d1tq1a_; c.46.1.3 (A:) Thiosulfate sulfurtransferase/Senescence-associated protein {Thale cress ( <i>Arabidopsis thaliana</i> ) [TaxId: 37(71.59/3.3)]<br><br>d1repc2 a.4.5.10 (C:144-246) RepE54 { <i>Escherichia coli</i> , mini-F plasmid [TaxId: 562]} (75.16/5.4)                              | hp                     |
| 9  | 3165 | 2893 | - | hp                                                                                      | hp                     | -                                       | -                         | PF06005.13; ZapB ; Cell division protein ZapB(91.97/2.6)                                                                                                                                                                                                                                            | hp                     |
| 10 | 3984 | 3220 | - | hp                                                                                      | hp                     | -                                       | -                         | d2ox7a1; b.172.1.1 (A:4-145) Hypothetical protein EF1440 { <i>Enterococcus faecalis</i> [TaxId: 1351]} (99.8/7.40e-19)<br><br>d2p84a1; b.172.1.1 (A:4-135) Orf041 product { <i>Staphylococcus</i> phage 37 [TaxId: 320840]} (99.77/7.30e-18)<br><br>PF09643.11; YopX; YopX protein (99.68/4.20e-16) | YopX-like protein      |
| 11 | 6404 | 4110 | - | putative viral helicase-like protein [ <i>Bacillus</i> phage PBC2]                      | 0.0e+00<br><br>0.0e+00 | recD_rel (55-734)<br><br>RecD (111-738) | 4.74e-104<br><br>6.76e-77 | COG0507; RecD; ATP-dependent exoDNase (exonuclease V), alpha subunit, helicase superfamily I [Replication, recombination and repa(100.0/9.80e-59)]                                                                                                                                                  | RecD-like DNA helicase |

|    |      |      |   |                                                                                                                                                                                                                     |                                       |                                         |                          |                                                                                                                                                                                                                                                                                                                                                             |                            |
|----|------|------|---|---------------------------------------------------------------------------------------------------------------------------------------------------------------------------------------------------------------------|---------------------------------------|-----------------------------------------|--------------------------|-------------------------------------------------------------------------------------------------------------------------------------------------------------------------------------------------------------------------------------------------------------------------------------------------------------------------------------------------------------|----------------------------|
|    |      |      |   | exodeoxyribonuclease V alpha chain [ <i>Bacillus</i> phage vB_BcoS-136]<br><br>RecD-like DNA helicase [ <i>Bacillus</i> phage Izhevsk]                                                                              | 0.0e+00                               | DEXSc_RecD-like (359-486)               | 6.11e-36                 | PF02689.15; Herpes_Helicase; Helicase (99.96/3.50e-28)<br><br>d1w36d1; c.37.1.19 (D:2-360) Exodeoxyribonuclease V alpha chain (RecD) { <i>Escherichia coli</i> [TaxId: 562]}(99.95/7.80e-26)                                                                                                                                                                |                            |
| 12 | 6636 | 7472 | + | putative StbA plasmid stability protein [ <i>Bacillus</i> phage PBC4]<br><br>putative StbA plasmid stability protein [ <i>Bacillus</i> phage pW4]<br><br>actin-like protein [ <i>Sporosarcina</i> phage Lietuvenis] | 1.0e-20<br><br>2.0e-17<br><br>9.0e-16 | ParM_like (8-269)<br><br>ALP_N (11-149) | 4.87e-18<br><br>2.28e-09 | cd10227; ParM_like; Plasmid segregation protein ParM and similar proteins. ParM is a plasmid-encoded bacterial homolog of actin,(99.92/1.40e-23)<br><br>PF06406.12; StbA ; StbA protein(99.9/1.50e-21)<br><br>COG1077; MreB; Actin-like ATPase involved in cell morphogenesis [Cell cycle control, cell division, chromosome partitioning].(99.88/6.50e-21) | ParM-like protein          |
| 13 | 7459 | 7773 | + | putative ParG-like protein [ <i>Bacillus</i> phage Izhevsk]                                                                                                                                                         | 3.0e-33                               | -                                       | -                        | d1x93a1; a.43.1.3 (A:31-73) Uncharacterized protein HP0222 { <i>Helicobacter pylori</i> [TaxId: 210]}(95.6/4.30e-02)<br><br>d1baza_a.43.1.1 (A:) Arc repressor { <i>Salmonella</i> bacteriophage P22 [TaxId: 10754]} (92.73/0.56)<br><br>d1p94a_a.43.1.3 (A:) Plasmid partition protein ParG { <i>Salmonella enterica</i> [TaxId: 28901]} (91.49/0.39)      | putative ParG-like protein |
| 14 | 7918 | 8124 | + | hp                                                                                                                                                                                                                  | hp                                    | -                                       | -                        | ('-', '-')                                                                                                                                                                                                                                                                                                                                                  | hp                         |

|    |       |       |   |                                                                                                                                                                                                                                       |                                  |                        |          |                                                                                                                                                                                                                                                                                                                                             |                                         |
|----|-------|-------|---|---------------------------------------------------------------------------------------------------------------------------------------------------------------------------------------------------------------------------------------|----------------------------------|------------------------|----------|---------------------------------------------------------------------------------------------------------------------------------------------------------------------------------------------------------------------------------------------------------------------------------------------------------------------------------------------|-----------------------------------------|
| 15 | 8320  | 8817  | + | hp                                                                                                                                                                                                                                    | hp                               | -                      | -        | KOG4631; NADH:ubiquinone oxidoreductase, NDUFB3/B12 subunit [Energy production and conversion] (85.11/3.50e+00)                                                                                                                                                                                                                             | hp                                      |
| 16 | 8827  | 9522  | + | M23 peptidase domain containing protein [ <i>Bacillus</i> phage PBC2]<br>endopeptidase [ <i>Bacillus</i> phage Izhevsk]<br>M23 peptidase domain containing protein [ <i>Bacillus</i> phage pW2]                                       | 5.0e-122<br>3.0e-119<br>2.0e-114 | Peptidase_M23 (26-125) | 1.77e-17 | COG0739; NlpD; Murein DD-endopeptidase MepM and murein hydrolase activator NlpD, contain LysM domain [Cell wall/membrane/envelope (99.54/3.70e-13)<br>d1qwya_; b.84.3.2 (A:) Peptidoglycan hydrolase LytM { <i>Staphylococcus aureus</i> [TaxId: 1280]} (99.51/9.40e-13)<br>PF01551.23; Peptidase_M23; Peptidase family M23 (98.39/2.70e-5) | M23 peptidase domain containing protein |
| 17 | 9547  | 9699  | + | hp                                                                                                                                                                                                                                    | hp                               | -                      | -        | PF05508.12; Ran-binding; RanGTP-binding protein (83.56/1.90e+00)                                                                                                                                                                                                                                                                            | hp                                      |
| 18 | 9700  | 12507 | + | p-loop containing nucleoside triphosphate hydrolase [ <i>Bacillus</i> phage PBC2]<br>p-loop containing nucleoside triphosphate hydrolase [ <i>Bacillus</i> phage pW2]<br>AAA-like domain protein [ <i>Bacillus</i> phage vB_BcoS-136] | 0.0e+00<br>0.0e+00<br>0.0e+00    | -                      | -        | PF19044.1; P-loop_TraG; TraG P-loop domain(99.96/1.20e-26)<br>d1e9ra_; c.37.1.11 (A:) Bacterial conjugative coupling protein TrwB { <i>Escherichia coli</i> [TaxId: 562]}(99.95/2.50e-25)<br>COG3451; VirB4; Type IV secretory pathway, VirB4 component [Intracellular trafficking, secretion, and vesicular transport].(99.95/4.70e-25)    | ATP binding domain TrwB-like protein    |
| 19 | 12546 | 13316 | + | Replic_Relax superfamily protein [ <i>Bacillus</i> phage Izhevsk]                                                                                                                                                                     | 1.0e-121                         | -                      | -        | PF13814.7; Replic_Relax; Replication-relaxation(99.81/7.60e-19)                                                                                                                                                                                                                                                                             | Replic_Relax superfamily protein        |



|    |       |       |   |                                                                                |          |                           |          |                                                                                                                                      |                                               |
|----|-------|-------|---|--------------------------------------------------------------------------------|----------|---------------------------|----------|--------------------------------------------------------------------------------------------------------------------------------------|-----------------------------------------------|
|    |       |       |   | gp27.3 [ <i>Bacillus</i> virus SPO1]                                           | 1.0e-14  |                           |          | d1ub9a_ ; a.4.5.28 (A:) Hypothetical protein PH1061 { <i>Pyrococcus horikoshii</i> [TaxId: 53953]}(97.42/1.50e-03)                   |                                               |
|    |       |       |   | plasmid replication-relaxation protein [ <i>Bacillus</i> phage CampHawk]       | 1.0e-14  |                           |          | d1t6sa2; a.4.5.60 (A:86-162) Segregation and condensation protein B, ScpB { <i>Chlorobium tepidum</i> [TaxId: 1097]}(97.35/1.60e-03) |                                               |
| 20 | 13544 | 14560 | + | Xer family site-specific tyrosine recombinase [ <i>Bacillus</i> phage Izhevsk] | 0.0e+00  | Phage_integrase (130-287) | 9.11e-08 | COG4973; XerC; Site-specific recombinase XerC [Replication, recombination and repair].(100.0/8.80e-32)                               | Xer family site-specific tyrosine recombinase |
|    |       |       |   | site-specific tyrosine recombinase [ <i>Bacillus</i> phage pW2]                | 0.0e+00  | recomb_XerD (34-193)      | 3.07e-06 | COG4974; XerD; Site-specific recombinase XerD [Replication, recombination and repair].(100.0/2.10e-30)                               |                                               |
|    |       |       |   | site-specific tyrosine recombinase [ <i>Bacillus</i> phage vB_BcoS-136]        | 2.0e-162 | DNA_BRE_C (145-281)       | 4.25e-06 | COG4342; COG4342; Integrase/Recombinase [Mobilome: prophages, transposons].(99.89/3.20e-22)                                          |                                               |
| 21 | 14642 | 14893 | + | hp                                                                             | hp       | -                         | -        | ('-', '-')                                                                                                                           | hp                                            |
| 22 | 14969 | 15205 | + | hp                                                                             | hp       | -                         | -        | PF18287.2; ; Hfx_Cass5 ; Integron Cassette Protein Hfx_Cass5(84.07/1.60e+00)                                                         | hp                                            |
| 23 | 16292 | 15444 | - | putative lambda O-type replication initiator [ <i>Bacillus</i> phage Izhevsk]  | 7.0e-112 | -                         | -        | COG5529; COG5529; Pyocin large subunit [Secondary metabolites biosynthesis, transport and catabolism].(98.21/1.70e-05)               | replication initiator                         |
|    |       |       |   | putative transcriptional regulator [ <i>Geobacillus</i> virus E3]              | 6.0e-20  |                           |          |                                                                                                                                      |                                               |

|    |       |       |   |                                                                                                                                                                                                          |                               |                                                |                          |                                                                                                                                                                                                                                                                                                                                                                                                             |                                                 |
|----|-------|-------|---|----------------------------------------------------------------------------------------------------------------------------------------------------------------------------------------------------------|-------------------------------|------------------------------------------------|--------------------------|-------------------------------------------------------------------------------------------------------------------------------------------------------------------------------------------------------------------------------------------------------------------------------------------------------------------------------------------------------------------------------------------------------------|-------------------------------------------------|
|    |       |       |   |                                                                                                                                                                                                          |                               |                                                |                          | PF06970.12; RepA_N ; Replication initiator protein A (RepA) N-terminus(98.01/2.60e-05)                                                                                                                                                                                                                                                                                                                      |                                                 |
|    |       |       |   |                                                                                                                                                                                                          |                               |                                                |                          | PF04492.14; Phage_rep_O ; Bacteriophage replication protein O (97.68/6.60e-04)                                                                                                                                                                                                                                                                                                                              |                                                 |
| 24 | 16498 | 16920 | + | hp                                                                                                                                                                                                       | hp                            | -                                              | -                        | COG2909; MalT; ATP-, maltotriose- and DNA-dependent transcriptional regulator MalT [Transcription].(98.49/1.00e-06)<br><br>d1p4wa_ ; a.4.6.2 (A:) Transcriptional regulator RcsB { <i>Erwinia amylovora</i> [TaxId: 552]}(98.27/5.20e-05)<br><br>d113la1 ; a.4.6.2 (A:170-234) Quorum-sensing transcription factor TraR, C-terminal domain { <i>Agrobacterium tumefaciens</i> [TaxId: 358]}(98.16/6.00e-05) | HTH domain containing transcriptional regulator |
| 25 | 16989 | 17336 | + | hp                                                                                                                                                                                                       | hp                            | -                                              | -                        | ('-', '-')                                                                                                                                                                                                                                                                                                                                                                                                  | hp                                              |
| 26 | 17336 | 17647 | + | hp                                                                                                                                                                                                       | hp                            | -                                              | -                        | ('-', '-')                                                                                                                                                                                                                                                                                                                                                                                                  | hp                                              |
| 27 | 17653 | 17955 | + | putative DNA binding protein [ <i>Bacillus</i> phage PBC2]<br><br>DNA-binding protein [ <i>Bacillus</i> phage Izhevsk]<br><br>integration host factor subunit alpha [ <i>Bacillus</i> phage vB_BcoS-136] | 4.0e-63<br>4.0e-50<br>4.0e-40 | Bac_DNA_binding (35-94)<br><br>PRK10664 (1-94) | 7.50e-07<br><br>8.60e-06 | d1mula_ ; a.55.1.1 (A:) HU protein { <i>Escherichia coli</i> [TaxId: 562]}(99.9/2.30e-22)<br><br>d1p71a_ ; a.55.1.1 (A:) HU protein { <i>Anabaena</i> sp. [TaxId: 1167]}(99.9/4.50e-22)<br><br>d4p3va_ ; a.55.1.1 (A:) HU protein { <i>Escherichia coli</i> , beta-isoform [TaxId: 562]}(99.9/8.90e-22)                                                                                                     | DNA-binding protein HU-beta                     |

|    |       |       |   |                                                                                    |         |                       |          |                                                                                                                                                                                       |                                                    |
|----|-------|-------|---|------------------------------------------------------------------------------------|---------|-----------------------|----------|---------------------------------------------------------------------------------------------------------------------------------------------------------------------------------------|----------------------------------------------------|
| 28 | 17975 | 19192 | + | putative PhoH-like protein<br>[ <i>Bacillus</i> phage PBC2]                        | 0.0e+00 | YlaK<br>(3-405)       | 3.68e-32 | COG1875; YlaK; Predicted ribonuclease<br>YlaK, contains NYN-type RNase and<br>PhoH-family ATPase domains [General<br>function prediction o(100.0/3.50e-38)                            | PhoH2 superfamily<br>RNA helicase-<br>ribonuclease |
|    |       |       |   | phosphate starvation-inducible<br>protein [ <i>Bacillus</i> phage pW2]             | 0.0e+00 | PhoH<br>(209-399)     | 2.61e-19 | COG1702; PhoH; Phosphate starvation-<br>inducible protein PhoH, predicted ATPase<br>[Signal transduction<br>mechanisms].(99.82/9.40e-19)                                              |                                                    |
|    |       |       |   | PhoH2 superfamily RNA<br>helicase-ribonuclease<br>[ <i>Bacillus</i> phage Izhevsk] | 0.0e+00 | PRK10536<br>(204-356) | 3.12e-11 | PF02562.17; PhoH ; PhoH-like<br>protein(99.81/8.60e-18)                                                                                                                               |                                                    |
| 29 | 20425 | 20628 | + | hp                                                                                 | hp      | YonK(2-56)            | 9.18e-04 | d2h4oa1; d.368.1.1 (A:2-63)<br>Uncharacterized protein YonK { <i>Bacillus<br/>subtilis</i> [TaxId: 1423]}(99.95/3.50e-27)<br><br>PF09642.11; ; YonK ; YonK<br>protein(99.94/4.90e-26) | YonK-like protein                                  |
| 30 | 20640 | 21884 | + | putative metallophosphatase<br>[ <i>Bacillus</i> phage PBC2]                       | 0.0e+00 | MPP_YfcE<br>(313-377) | 1.95e-04 | d2a22a1; d.159.1.7 (A:4-196) Vacuolar<br>protein sorting 29, VPS29<br>{ <i>Cryptosporidium parvum</i> [TaxId:<br>5807]}(99.73/6.90e-16)                                               | metallophosphatase                                 |
|    |       |       |   | metallophosphatase [ <i>Bacillus</i><br>phage Izhevsk]                             | 0.0e+00 |                       |          | d3ck2a1; d.159.1.7 (A:1-173)<br>Uncharacterized protein SP1879<br>{ <i>Pneumococcus (Streptococcus<br/>pneumoniae)</i> [TaxId: 1313]}(99.7/1.60e-<br>15)                              |                                                    |
|    |       |       |   | putative<br>metallophosphatase/DNA<br>polymerase [ <i>Bacillus</i> phage<br>pW2]   | 0.0e+00 |                       |          | d1su1a_; d.159.1.7 (A:) Phosphodiesterase<br>yfcE { <i>Escherichia coli</i> [TaxId:<br>562]}(99.62/4.80e-15)                                                                          |                                                    |

|    |       |       |   |                                                                                                                                                                                                       |                                       |   |   |                                                                                                                                                                                                                                                                                                                     |                                      |
|----|-------|-------|---|-------------------------------------------------------------------------------------------------------------------------------------------------------------------------------------------------------|---------------------------------------|---|---|---------------------------------------------------------------------------------------------------------------------------------------------------------------------------------------------------------------------------------------------------------------------------------------------------------------------|--------------------------------------|
| 31 | 22053 | 22952 | + | putative small terminase<br>[ <i>Bacillus</i> phage Izhevsk]<br><br>YonG-like protein<br>[ <i>Brevibacillus</i> phage<br>Sundance]                                                                    | 0.0e+00<br><br>2.0e-58                | - | - | PF12898.8; Stc1; Stc1 domain<br>(71.14/2.50e+00)                                                                                                                                                                                                                                                                    | putative terminase,<br>small subunit |
| 32 | 22933 | 24621 | + | putative terminase ATPase<br>subunit [ <i>Bacillus</i> phage<br>PBC2]<br><br>putative terminase ATPase<br>subunit [ <i>Bacillus</i> phage pW2]<br><br>protein YonF [ <i>Lactococcus</i><br>phage AM1] | 0.0e+00<br><br>0.0e+00<br><br>0.0e+00 | - | - | PF03354.16; terminase_1 ; Phage<br>Terminase<br>(100.0/2.30e-33)<br><br>COG5323; COG5323; Large terminase<br>phage packaging protein [Mobilome:<br>prophages, transposons].(100.0/9.10e-32)<br><br>COG4373; COG4373; Mu-like prophage<br>FluMu protein gp28 [Mobilome:<br>prophages, transposons].(100.0/6.80e-31)  | terminase, large<br>subunit          |
| 33 | 24636 | 26162 | + | putative structural protein<br>[ <i>Bacillus</i> phage PBC2]<br><br>putative structural protein<br>[ <i>Bacillus</i> phage phiKir1]<br><br>portal protein [ <i>Bacillus</i> phage<br>Izhevsk]         | 0.0e+00<br><br>0.0e+00<br><br>0.0e+00 | - | - | COG5511; COG5511; Bacteriophage<br>capsid protein [Mobilome: prophages,<br>transposons].(99.89/5.10e-21)<br><br>COG4695; BeeE; Phage portal protein<br>BeeE [Mobilome: prophages,<br>transposons].(99.67/8.20e-15)<br><br>PF05136.14; ; Phage_portal_2 ; Phage<br>portal protein, lambda family<br>(99.61/1.20e-14) | portal protein                       |
| 34 | 26180 | 27568 | + | putative prohead protease<br>[ <i>Bacillus</i> phage Izhevsk]<br><br>structural protein<br>[ <i>Lactococcus</i> phage WRP3]                                                                           | 0.0e+00<br><br>3.0e-43                | - | - | PF09979.10; ; DUF2213 ; Uncharacterized<br>protein conserved in bacteria<br>(DUF2213)(94.96/4.30e-01)                                                                                                                                                                                                               | putative prohead<br>protease         |

|    |       |       |   |                                                                                                                                                                                                          |                                       |   |   |                                                                                                                                                                                                                                                                                                              |                      |
|----|-------|-------|---|----------------------------------------------------------------------------------------------------------------------------------------------------------------------------------------------------------|---------------------------------------|---|---|--------------------------------------------------------------------------------------------------------------------------------------------------------------------------------------------------------------------------------------------------------------------------------------------------------------|----------------------|
|    |       |       |   | structural protein<br>[ <i>Lactococcus</i> phage AM1]                                                                                                                                                    | 2.0e-42                               |   |   | PF05929.12; Phage_GPO ; Phage capsid scaffolding protein (GPO) serine peptidase (94.31/1.5)<br><br>PF03420.14; Peptidase_S77 ; Prohead core protein serine protease (93.99/3.8)                                                                                                                              |                      |
| 35 | 27585 | 28091 | + | structural protein<br>[ <i>Lactococcus</i> phage WRP3]<br><br>putative structural protein<br>[ <i>Lactococcus</i> phage phiL47]<br><br>putative phage structural protein [ <i>Lactococcus</i> phage 949] | 5.0e-25<br><br>2.0e-24<br><br>2.0e-24 | - | - | ('-', '-')<br><br><br>                                                                                                                                                                                                                                                                                       | hp                   |
| 36 | 28122 | 29180 | + | structural protein<br>[ <i>Lactococcus</i> phage AM4]<br><br>structural protein<br>[ <i>Lactococcus</i> phage WRP3]<br><br>structural protein<br>[ <i>Lactococcus</i> phage AM1]                         | 3.0e-79<br><br>6.0e-79<br><br>1.0e-78 | - | - | d2fsya1; d.183.1.1 (A:104-383) Major capsid protein gp5 {Bacteriophage HK97 [TaxId: 37554]}(98.0/1.50e-04)<br><br>COG4653 COG4653; Predicted phage phi-C31 gp36 major capsid-like protein [Mobilome: prophages, transposons]. (96.75/0.22)<br><br>PF05065.14; Phage_capsid ; Phage capsid family (94.62/1.8) | major capsid protein |
| 37 | 29279 | 29983 | + | putative AcrB/AcrD/AcrF family protein [ <i>Brevibacillus</i> phage Sundance]                                                                                                                            | 2.0e-17                               | - | - | ('-', '-')<br><br>                                                                                                                                                                                                                                                                                           | hp                   |
| 38 | 29996 | 30457 | + | putative structural protein<br>[ <i>Bacillus</i> phage PBC2]                                                                                                                                             | 8.0e-93<br>1.0e-55<br>4.0e-22         | - | - | PF11650.9; P22_Tail-4 ; P22 tail accessory factor (27.62/330)                                                                                                                                                                                                                                                | hp                   |

|    |       |       |   |                                                                                                                                                                                                    |                                          |   |   |                                                                                                                                                                                                                                                                                           |                                  |
|----|-------|-------|---|----------------------------------------------------------------------------------------------------------------------------------------------------------------------------------------------------|------------------------------------------|---|---|-------------------------------------------------------------------------------------------------------------------------------------------------------------------------------------------------------------------------------------------------------------------------------------------|----------------------------------|
|    |       |       |   | putative structural protein<br>[ <i>Bacillus</i> phage pW2]                                                                                                                                        |                                          |   |   |                                                                                                                                                                                                                                                                                           |                                  |
|    |       |       |   | putative structural protein<br>[ <i>Lactococcus</i> phage phiL47]                                                                                                                                  |                                          |   |   |                                                                                                                                                                                                                                                                                           |                                  |
| 39 | 30454 | 30771 | + | hp                                                                                                                                                                                                 | hp                                       | - | - | ('-', '-')                                                                                                                                                                                                                                                                                | hp                               |
| 40 | 30774 | 31529 | + | putative structural protein<br>[ <i>Bacillus</i> phage PBC2]<br><br>head completion protein<br>[ <i>Bacillus</i> phage Izhevsk]<br><br>putative structural protein<br>[ <i>Bacillus</i> phage pW2] | 2.0e-159<br><br>1.0e-130<br><br>3.0e-125 | - | - | COG5614; COG5614; Bacteriophage head-tail adaptor [Mobilome: prophages, transposons].(94.1/7.70e-01)<br><br>PF05354.12; Phage_attach ; Phage Head-Tail Attachment (93.82/1.3)<br><br>d2kx4a_b.106.1.2 (A:) Tail attachment protein gpF3 {Bacteriophage lambda [TaxId: 10710]} (91.86/2.4) | head completion protein          |
| 41 | 31529 | 32026 | + | putative structural protein<br>[ <i>Bacillus</i> phage pW2]<br><br>structural protein<br>[ <i>Lactococcus</i> phage WRP3]<br><br>structural protein<br>[ <i>Lactococcus</i> phage AM4]             | 4.0e-62<br><br>2.0e-24<br><br>9.0e-24    | - | - | PF06526.13; ; DUF1107 ; Protein of unknown function (DUF1107)(73.13/4.30e+00)<br><br>PF09646.11; Gp37 ; Gp37 protein (50.27/120)<br><br>PF06141.12; Phage_tail_U ; Phage minor tail protein U (34.98/210)                                                                                 | putative tail terminator protein |
| 42 | 32033 | 32893 | + | putative tail assembly chaperone [ <i>Bacillus</i> phage Izhevsk]                                                                                                                                  | 3.0e-89                                  | - | - | PF10109.10; Phage_TAC_7 ; Phage tail assembly chaperone proteins, E, or 41 or 14 (14.96/310)                                                                                                                                                                                              | putative tail assembly chaperone |
| 43 | 32940 | 33695 | + | putative structural protein<br>[ <i>Bacillus</i> phage PBC2]<br><br>tail tube protein [ <i>Bacillus</i> phage Izhevsk]                                                                             | 2.0e-127<br><br>5.0e-120                 | - | - | PF09343.11; ; DUF2460 ; Conserved hypothetical protein 2217 (DUF2460)(85.26/4.10e+00)                                                                                                                                                                                                     | tail tube protein                |

|    |       |       |   |                                                                                                                                                                                                                                      |                                        |                                                       |                          |                                                                                                                                                                                                                                                                                                                                                     |                                                      |
|----|-------|-------|---|--------------------------------------------------------------------------------------------------------------------------------------------------------------------------------------------------------------------------------------|----------------------------------------|-------------------------------------------------------|--------------------------|-----------------------------------------------------------------------------------------------------------------------------------------------------------------------------------------------------------------------------------------------------------------------------------------------------------------------------------------------------|------------------------------------------------------|
|    |       |       |   | putative structural protein<br>[ <i>Bacillus</i> phage pW2]                                                                                                                                                                          | 1.0e-114                               |                                                       |                          | PF04630.13; Phage_TTP_1 ; Phage tail<br>tube protein (79.15/33)<br><br>PF04630.13; Phage_TTP_1 ; Phage tail<br>tube protein (74.25/18)<br><br>PF06488.12; L_lac_phage_MSP ; Phage<br>tail tube protein (43.55/330)                                                                                                                                  |                                                      |
| 44 | 33871 | 34392 | + | hp                                                                                                                                                                                                                                   | hp                                     | -                                                     | -                        | ('-', '-')                                                                                                                                                                                                                                                                                                                                          | hp                                                   |
| 45 | 34361 | 34843 | + | putative structural protein<br>[ <i>Bacillus</i> phage PBC2]<br><br>tail completion protein<br>[ <i>Bacillus</i> phage Izhevsk]<br><br>structural protein<br>[ <i>Lactococcus</i> phage AM4]                                         | 2.0e-98<br><br>4.0e-39<br><br>4.0e-12  | -                                                     | -                        | COG5005; COG5005; Mu-like prophage<br>protein gpG [Mobilome: prophages,<br>transposons]. (96.57/4.40e-02)                                                                                                                                                                                                                                           | tail completion protein                              |
| 46 | 34859 | 35836 | + | putative site specific<br>recombinase [ <i>Bacillus</i> phage<br>phiKir1]<br><br>putative site specific<br>recombinase [ <i>Bacillus</i> phage<br>PBC2]<br><br>putative site specific<br>recombinase [ <i>Bacillus</i> phage<br>pW2] | 0.0e+00<br><br>0.0e+00<br><br>1.0e-155 | recomb_XerC<br>(27-312)<br><br>DNA_BRE_C<br>(140-313) | 1.72e-28<br><br>7.61e-24 | COG4973; XerC; Site-specific<br>recombinase XerC [Replication,<br>recombination and repair]. (100.0/2.30e-<br>33)<br><br>COG4974; XerD; Site-specific<br>recombinase XerD [Replication,<br>recombination and repair]. (100.0/9.50e-<br>32)<br><br>COG4342; COG4342;<br>Integrase/Recombinase [Mobilome:<br>prophages, transposons].(99.93/1.30e-24) | Xer family site-<br>specific tyrosine<br>recombinase |
| 47 | 35913 | 45080 | + | tape measure protein [ <i>Bacillus</i><br>phage Izhevsk]                                                                                                                                                                             | 0.0e+00                                | tape_meas_TP901<br>(636-981)                          | 4.87e-41                 | COG5280; YqbO; Phage-related minor tail<br>protein [Mobilome: prophages,<br>transposons].(99.43/2.50e-08)                                                                                                                                                                                                                                           | tape measure protein                                 |

|    |       |       |   |                                                                                    |          |                          |                      |                                                                                                                   |                              |
|----|-------|-------|---|------------------------------------------------------------------------------------|----------|--------------------------|----------------------|-------------------------------------------------------------------------------------------------------------------|------------------------------|
|    |       |       |   | putative tail tape measure protein [ <i>Bacillus</i> phage pW2]                    | 0.0e+00  | PhageMin_Tail (676-877)  | 2.50e-18             | COG5283; COG5283; Phage-related tail protein [Mobilome: prophages, transposons].(99.43/3.20e-07)                  |                              |
|    |       |       |   | putative tail tape measure protein [ <i>Bacillus</i> phage PBC2]                   | 0.0e+00  | SH3_3 (2896-2951)        | 3.80e-10             | PF10145.10; PhageMin_Tail ; Phage-related minor tail protein(98.73/1.60e-06)                                      |                              |
| 48 | 45124 | 45894 | + | tail protein [ <i>Bacillus</i> phage Izhevsk]                                      | 6.0e-138 | YomH (9-255)             | 2.98e-17             | COG4722; YomH; Phage-related protein [Mobilome: prophages, transposons]. (99.97/6.30e-29)                         | distal tail protein          |
|    |       |       |   | tail protein [ <i>Bacillus</i> phage pW2]                                          | 1.0e-129 | Sipho_tail (40-255)      | 2.61e-07             | PF05709.12; Sipho_tail; Phage tail protein (99.83/1.40e-17)                                                       |                              |
|    |       |       |   | YomH-like protein [ <i>Brevibacillus</i> phage Sundance]                           | 4.0e-35  |                          |                      | PF16774.6; Baseplate; Baseplate protein (95.57/0.91)                                                              |                              |
| 49 | 45957 | 46442 | + | putative cell wall-associated hydrolase [ <i>Bacillus</i> phage pW2]               | 4.0e-74  | Peptidase_C92 (3-161)    | 1.30e-07             | d2if6a1; d.3.1.21 (A:19-200) Hypothetical protein YiiX { <i>Escherichia coli</i> [TaxId: 562]} (99.93/3.50e-24)   | permuted papain-like amidase |
|    |       |       |   | putative cell wall-associated hydrolase [ <i>Bacillus</i> phage vB_BcoS-136]       | 5.0e-62  | PRK10030 (3-134)         | 5.75e-06             | cd13955; DUF830; Orthopoxvirus protein of unknown function (DUF830). (99.92/3.10e-23)                             |                              |
|    |       |       |   | putative permuted papain-like amidase enzyme [ <i>Bacillus</i> phage vB_BsuM-Goe3] | 2.0e-33  |                          |                      | PF05708.13; Peptidase_C92; Permuted papain-like amidase enzyme, YaeF/YiiX, C92 family (99.91/8.00e-23)            |                              |
| 50 | 46459 | 49119 | + | putative tail endopeptidase [ <i>Bacillus</i> phage Izhevsk]                       | 0.0e+00  | put_anti_recept (43-254) | 5.64e-09             | COG4926; PblB; Phage-related protein [Mobilome: prophages, transposons]. (99.97/9.50e-29)                         | tail endopeptidase           |
|    |       |       |   | minor structural protein [ <i>Bacillus</i> phage pW2]                              | 0.0e+00  | Prophage_tail (387-500)  | 1.75e-08<br>1.01e-05 | PF06605.12; ; Prophage_tail ; Prophage endopeptidase tail(99.56/1.50e-13)<br>PF14594.7; ; Sipho_Gp37 ; Siphovirus |                              |



|    |       |       |   |                                                                    |          |                         |          |                                                                                                                                        |                          |
|----|-------|-------|---|--------------------------------------------------------------------|----------|-------------------------|----------|----------------------------------------------------------------------------------------------------------------------------------------|--------------------------|
|    |       |       |   | putative tail protein [ <i>Lactococcus</i> phage phiL47]           | 1.0e-128 | Prophage_tail (44-253)  |          | ReqiPepy6 Gp37-like protein(99.5/8.60e-12)                                                                                             |                          |
| 51 | 49151 | 50890 | + | putative tail protein [ <i>Bacillus</i> phage pW4]                 | 1.0e-146 |                         |          | KOG4194 Membrane glycoprotein LIG-1 [Signal transduction mechanisms] (70.75/92)                                                        | hp                       |
|    |       |       |   | putative tail protein [ <i>Bacillus</i> phage PBC4]                | 3.0e-144 | -                       | -        |                                                                                                                                        |                          |
|    |       |       |   | minor structural protein [ <i>Bacillus</i> phage pW2]              | 2.0e-106 |                         |          |                                                                                                                                        |                          |
| 52 | 51025 | 55065 | + | putative receptor-binding protein [ <i>Bacillus</i> phage Izhevsk] | 0.0e+00  |                         |          | d1h6ya_; b.18.1.7 (A:) Xylan-binding domain { <i>Clostridium thermocellum</i> [TaxId: 1515]} (97.32/1.40e-02)                          | receptor-binding protein |
|    |       |       |   | tail fiber protein [ <i>Bacillus</i> phage pW2]                    | 0.0e+00  | -                       | -        | d1cx1a1; b.18.1.14 (A:3-153) Cellulose-binding domain of cellulase C { <i>Cellulomonas fimi</i> [TaxId: 1708]} (96.91/2.80e-02)        |                          |
|    |       |       |   | putative tail fiber [ <i>Bacillus</i> phage phiNIT1]               | 1.0e-95  |                         |          | d1guia_; b.18.1.14 (A:) Carbohydrate binding module from laminarinase 16A { <i>Thermotoga maritima</i> [TaxId: 2336]} (96.59/9.70e-02) |                          |
| 53 | 55089 | 57830 | + | endosialidase [ <i>Bacillus</i> phage Izhevsk]                     | 0.0e+00  | DUF859 (7-600)          | 1.79e-22 | PF05895.13; DUF859; Siphovirus protein of unknown function (DUF859) (100.0/1.50e-67)                                                   | endosialidase            |
|    |       |       |   | minor tail protein [ <i>Bacillus</i> phage pW2]                    | 0.0e+00  | Peptidase_S74 (811-861) | 1.68e-04 | KOG3661; Uncharacterized conserved protein [Function unknown] (99.38/1.60e-12)                                                         |                          |
|    |       |       |   | chaperone domain of endosialidase [ <i>Bacillus</i> phage Kioshi]  | 0.0e+00  |                         |          | PF17253.3; DUF5320; Family of unknown function (DUF5320)(94.43/7.30e-02)                                                               |                          |

|    |       |       |   |                                                                                                                                                                                                          |                                       |                                    |                          |                                                                                                                                                                                                                                                                                                                                                                                                                                               |                                    |
|----|-------|-------|---|----------------------------------------------------------------------------------------------------------------------------------------------------------------------------------------------------------|---------------------------------------|------------------------------------|--------------------------|-----------------------------------------------------------------------------------------------------------------------------------------------------------------------------------------------------------------------------------------------------------------------------------------------------------------------------------------------------------------------------------------------------------------------------------------------|------------------------------------|
| 54 | 57833 | 58330 | + | hp                                                                                                                                                                                                       | hp                                    | -                                  | -                        | PF14301.7; DUF4376; Domain of unknown function (DUF4376) (99.38/4.70e-11)<br><br>PF10653.10; Phage-A118_gp45; Protein gp45 of Bacteriophage A118 (25.33/69)                                                                                                                                                                                                                                                                                   | hp                                 |
| 55 | 58358 | 58519 | + | hp                                                                                                                                                                                                       | hp                                    | -                                  | -                        | COG2960; YqiC; Uncharacterized conserved protein YqiC, BMFP domain [Function unknown]. (86.94/6.20e+00)<br>PF10224.10; DUF2205; Short coiled-coil protein (76.33/12)<br>KOG3650 Predicted coiled-coil protein [General function prediction only] (69.77/17)<br>PF17594.3; GP57; Phage Tail fiber assembly helper gene product 57 (52.15/76)                                                                                                   | putative tail fiber chaperone      |
| 56 | 58597 | 59532 | + | N-acetylmuramoyl-L-alanine amidase [ <i>Bacillus</i> phage Izhevsk]<br><br>putative alanine amidase/endolysin [ <i>Bacillus</i> phage pW2]<br><br>putative alanine amidase [ <i>Bacillus</i> phage PBC2] | 0.0e+00<br><br>0.0e+00<br><br>0.0e+00 | CwlA (3-161)<br><br>SH3b (252-304) | 1.35e-62<br><br>2.40e-04 | d1yb0a1; d.118.1.1 (A:1-157) N-acetylmuramoyl-L-alanine amidase PlyG {Anthrax <i>Bacillus</i> ( <i>Bacillus anthracis</i> ) [TaxId: 1392]} (99.83/2.80e-18)<br><br>COG5632; CwlA; N-acetylmuramoyl-L-alanine amidase CwlA [Cell wall/membrane/envelope biogenesis]. (99.71/2.20e-15)<br><br>d2cb3a1; d.118.1.1 (A:174-344) Peptidoglycan-recognition protein-LE {Fruit fly ( <i>Drosophila melanogaster</i> ) [TaxId: 7227]} (99.58/2.90e-14) | N-acetylmuramoyl-L-alanine amidase |
| 57 | 59603 | 59929 | + | hp                                                                                                                                                                                                       | hp                                    | -                                  | -                        | COG3105; YhcB; Uncharacterized membrane-anchored protein YhcB,                                                                                                                                                                                                                                                                                                                                                                                | putative holin                     |

|    |       |       |   |                                                                                                                                                  |                                              |                         |          |                                                                                                                                                                                                                                                                                                                                                                                                                                              |       |
|----|-------|-------|---|--------------------------------------------------------------------------------------------------------------------------------------------------|----------------------------------------------|-------------------------|----------|----------------------------------------------------------------------------------------------------------------------------------------------------------------------------------------------------------------------------------------------------------------------------------------------------------------------------------------------------------------------------------------------------------------------------------------------|-------|
|    |       |       |   |                                                                                                                                                  |                                              |                         |          | <p>DUF1043 family [Function unknown]. (98.27/1.90e-04)</p> <p>COG4942; EnvC; Septal ring factor EnvC, activator of murein hydrolases AmiA and AmiB [Cell cycle control, cell division, chromoso(98.16/4.10e-04)</p> <p>COG3883 CwlO1; Uncharacterized N-terminal domain of peptidoglycan hydrolase CwlO [Function unknown]. (97.6/0.014)</p> <p>PF16082.6; Phage_holin_2_4; Bacteriophage holin family, superfamily II-like (95.3/0.077)</p> |       |
| 58 | 59988 | 60326 | + | <p>holin [<i>Bacillus</i> phage Izhevsk]</p> <p>putative holin [<i>Bacillus</i> phage PBC2]</p> <p>holin [<i>Bacillus</i> phage vB_BcoS-136]</p> | <p>4.0e-52</p> <p>6.0e-51</p> <p>4.0e-33</p> | Phage_holin_6_1 (8-103) | 5.00e-11 | <p>PF09682.11; hage_holin_6_1; Bacteriophage holin of superfamily 6 (Holin_LLH)(99.89/6.00e-22)</p>                                                                                                                                                                                                                                                                                                                                          | holin |
| 59 | 60346 | 60525 | + | hp                                                                                                                                               | hp                                           | -                       | -        | <p>COG4873; YkvS; Uncharacterized protein YkvS, DUF2187 family [Function unknown]. (96.76/7.70e-03)</p> <p>PF09953.10; DUF2187; Uncharacterized protein conserved in bacteria (DUF2187) (96.78/1.10e-02)</p> <p>cd06085; KOW_Spt5_5; KOW domain of Spt5, repeat 5. Spt5, an eukaryotic</p>                                                                                                                                                   | hp    |

|    |       |       |   |                                                                                                                                                                                                   |                        |                       |          |                                                                                                                                                                                                                                                                                                                 |                                                           |
|----|-------|-------|---|---------------------------------------------------------------------------------------------------------------------------------------------------------------------------------------------------|------------------------|-----------------------|----------|-----------------------------------------------------------------------------------------------------------------------------------------------------------------------------------------------------------------------------------------------------------------------------------------------------------------|-----------------------------------------------------------|
|    |       |       |   |                                                                                                                                                                                                   |                        |                       |          | ortholog of NusG, contains multiple KOW motifs at its C-te(96.31/3.10e-02)                                                                                                                                                                                                                                      |                                                           |
| 60 | 60539 | 61213 | + | putative Ig-like domain-containing protein [ <i>Bacillus</i> phage Izhevsk]                                                                                                                       | 2.0e-133               | -                     | -        | PF13750.7; Big_3_3; Bacterial Ig-like domain (group 3) (95.32/8.20e-01)                                                                                                                                                                                                                                         | putative Ig-like domain-containing protein                |
| 61 | 61265 | 61720 | + | putative Ig-like domain-containing protein [ <i>Bacillus</i> phage Izhevsk]                                                                                                                       | 9.0e-82                | -                     | -        | PF15418.7; DUF4625; Domain of unknown function (DUF4625) (96.38/1.80e-01)<br><br>PF13750.7; Big_3_3; Bacterial Ig-like domain (group 3) (76.35/25)                                                                                                                                                              | putative Ig-like domain-containing protein                |
| 62 | 61726 | 62010 | + | hp                                                                                                                                                                                                | hp                     | -                     | -        | COG2373; YfaS; Uncharacterized conserved protein YfaS, alpha-2-macroglobulin family [General function prediction only]. (98.91/7.00e-08)<br><br>PF01835.20; MG2; MG2 domain(98.87/1.80e-07)<br><br>KOG1366; Alpha-macroglobulin [Posttranslational modification, protein turnover, chaperones] (98.77/2.80e-07) | hp                                                        |
| 63 | 62023 | 62985 | + | concanavalin A-like lectin/glucanase superfamily protein [ <i>Bacillus</i> phage Izhevsk]<br><br>putative concanavalin A-like lectin/glucanases superfamily protein [Prokaryotic dsDNA virus sp.] | 0.0e+00<br><br>1.0e-05 | Laminin_G_3 (141-210) | 1.72e-10 | d1ms9a1; b.29.1.15 (A:409-632) Trypanosoma sialidase, C-terminal domain { <i>Trypanosoma cruzi</i> [TaxId: 5693]} (99.1/3.10e-07)<br><br>d1n1ta1; b.29.1.15 (A:413-634) <i>Trypanosoma sialidase</i> , C-terminal domain { <i>Trypanosoma rangeli</i> [TaxId: 5698]} (99.05/8.90e-07)                           | Concanavalin A-like lectin/glucanases superfamily protein |

|    |       |       |   |                                                                                          |         |              |          |                                                                                                                                                                                                                                                                                                                                                                                           |                                  |
|----|-------|-------|---|------------------------------------------------------------------------------------------|---------|--------------|----------|-------------------------------------------------------------------------------------------------------------------------------------------------------------------------------------------------------------------------------------------------------------------------------------------------------------------------------------------------------------------------------------------|----------------------------------|
|    |       |       |   | Concanavalin A-like lectin/glucanases superfamily [uncultured <i>Caudovirales</i> phage] | 1.0e-03 |              |          | d1a8da1; b.29.1.6 (A:1-247) <i>Tetanus neurotoxin</i> { <i>Clostridium tetani</i> [TaxId: 1513]} (98.9/4.70e-06)                                                                                                                                                                                                                                                                          |                                  |
| 64 | 63065 | 63592 | + | hp                                                                                       | hp      | -            | -        | PF17726.2; DpnI_C; Dam-replacing HTH domain (96.18/4.10e-02)                                                                                                                                                                                                                                                                                                                              | HTH domain containing protein    |
| 65 | 64127 | 63648 | - | -                                                                                        | -       | -            | -        | ('-', '-')                                                                                                                                                                                                                                                                                                                                                                                | hp                               |
| 66 | 64785 | 64147 | - | -                                                                                        | -       | -            | -        | ('-', '-')                                                                                                                                                                                                                                                                                                                                                                                | hp                               |
| 67 | 65367 | 64789 | - | holliday junction resolvase [ <i>Bacillus</i> phage pW2]                                 | 4.0e-66 | RuvC (9-169) | 8.32e-22 | d4ep4a_; c.55.3.6 (A:) RuvC resolvase { <i>Thermus thermophilus</i> [TaxId: 300852]} (99.93/3.10e-23)                                                                                                                                                                                                                                                                                     | Holliday junction resolvase RuvC |
|    |       |       |   | holliday-junction resolvase [ <i>Bacillus</i> phage Izhevsk]                             | 2.0e-64 |              |          | d1hjra_; c.55.3.6 (A:) RuvC resolvase { <i>Escherichia coli</i> [TaxId: 562]} (99.92/1.40e-22)                                                                                                                                                                                                                                                                                            |                                  |
|    |       |       |   | holliday junction resolvase [ <i>Bacillus</i> phage vB_BcoS-136]                         | 1.0e-48 |              |          | COG0817; RuvC; Holliday junction resolvosome RuvABC endonuclease subunit [Replication, recombination and repair]. (99.91/1.60e-22)                                                                                                                                                                                                                                                        |                                  |
| 68 | 65606 | 65442 | - | hp                                                                                       | hp      | -            | -        | d1imla1; g.39.1.3 (A:1-28) Cysteine-rich (intestinal) protein, CRP, CRIP {Rat ( <i>Rattus rattus</i> ) [TaxId: 10117]} (96.89/6.40e-04)<br><br>d1b8ta1; g.39.1.3 (A:1-35) Cysteine-rich (intestinal) protein, CRP, CRIP {Chicken ( <i>Gallus gallus</i> ) [TaxId: 9031]} (96.55/1.90e-03)<br><br>d1zfoa_; g.39.1.4 (A:) LASP-1 {Pig ( <i>Sus scrofa</i> ) [TaxId: 9823]} (96.49/2.40e-03) | hp                               |

|    |       |       |   |                                                                       |          |                          |            |                                                                                                                                  |                                  |
|----|-------|-------|---|-----------------------------------------------------------------------|----------|--------------------------|------------|----------------------------------------------------------------------------------------------------------------------------------|----------------------------------|
| 69 | 69064 | 65690 | - | DNA polymerase III alpha subunit [ <i>Bacillus</i> phage PBC2]        | 0.0e+00  | DnaE (4-958)             | 2.21e-137  | COG0587; DnaE; DNA polymerase III, alpha subunit [Replication, recombination and repair]. (100.0/5.70e-158)                      | DNA polymerase III alpha subunit |
|    |       |       |   | DNA polymerase III subunit alpha [ <i>Bacillus</i> phage vB_BcoS-136] | 0.0e+00  | dnaE (1-877)             | 4.82e-118  | COG2176; PolC; DNA polymerase III, alpha subunit (gram-positive type) [Replication, recombination and repair]. (100.0/7.20e-125) |                                  |
|    |       |       |   | DNA polymerase III [ <i>Clostridioides</i> phage LIBA6276]            | 0.0e+00  | DNA_pol3_alpha (330-581) | 4.38e-61   | PF07733.13; DNA_pol3_alpha; Bacterial DNA polymerase III alpha NTPase domain (100.0/1.50e-45)                                    |                                  |
| 70 | 69575 | 69078 | - | hp                                                                    | hp       | -                        | -          | COG5475; YodC; Uncharacterized conserved protein YodC, DUF2158 family [Function unknown]. (84.07/1.20e+00)                       | hp                               |
| 71 | 70278 | 69658 | - | putative thymidine kinase [ <i>Bacillus</i> phage PBC2]               | 8.0e-136 | PRK04296 (1-191)         | 1.49e-29   | COG1435; Tdk; Thymidine kinase [Nucleotide transport and metabolism]. (99.95/4.80e-26)                                           | thymidine kinase                 |
|    |       |       |   | thymidine kinase [ <i>Bacillus</i> phage Izhevsk]                     | 6.0e-109 |                          |            | KOG3125; Thymidine kinase [Nucleotide transport and metabolism] (99.95/2.30e-25)                                                 |                                  |
|    |       |       |   | putative thymidine kinase [ <i>Bacillus</i> phage pW2]                | 8.0e-100 |                          |            | PF00265.19; TK; Thymidine kinase (99.9/1.30e-21)                                                                                 |                                  |
| 72 | 70587 | 70288 | - | hp                                                                    | hp       | -                        | -          | PF09435.11; DUF2015; Fungal protein of unknown function (DUF2015) (76.6/5.70e+00)                                                | hp                               |
| 73 | 71152 | 70574 | - | putative 5'-nucleotidase [ <i>Bacillus</i> phage Izhevsk]             | 1.0e-89  | YfbR (41-115)            | 5.84e-09   | d2gz4a1; a.211.1.1 (A:6-205) Hypothetical protein Atu1052 { <i>Agrobacterium tumefaciens</i> [TaxId: 358]} (100.0/1.00e-37)      | 5'-nucleotidase                  |
|    |       |       |   | putative phosphohydrolase [ <i>Bacillus</i> phage pW2]                | 4.0e-83  | HD_2 (38-125)            | (7.01e-07) |                                                                                                                                  |                                  |

|    |       |       |   |                                                                                                                                                                                                                                                                                   |                                       |                                                     |                          |                                                                                                                                                                                                                                                                                                                                                                                                                                         |                                                      |
|----|-------|-------|---|-----------------------------------------------------------------------------------------------------------------------------------------------------------------------------------------------------------------------------------------------------------------------------------|---------------------------------------|-----------------------------------------------------|--------------------------|-----------------------------------------------------------------------------------------------------------------------------------------------------------------------------------------------------------------------------------------------------------------------------------------------------------------------------------------------------------------------------------------------------------------------------------------|------------------------------------------------------|
|    |       |       |   | putative phosphohydrolase<br>[ <i>Brevibacillus</i> phage<br>Sundance]                                                                                                                                                                                                            | 2.0e-30                               |                                                     |                          | KOG3197; Predicted hydrolases of HD<br>superfamily [General function prediction<br>only] (99.61/1.90e-14)<br><br>d1xx7a1; a.211.1.1 (A:2-172) Oxetanocin-<br>like protein PF0395 { <i>Pyrococcus furiosus</i><br>[TaxId: 2261]} (99.44/3.50e-12)<br><br>d2para_ a.211.1.1 (A:) 5'-nucleotidase<br>YfbR { <i>Escherichia coli</i> [TaxId: 562]}<br>(99.31/1e-10)                                                                         |                                                      |
| 74 | 71373 | 71152 | - | hp                                                                                                                                                                                                                                                                                | hp                                    | -                                                   | -                        | PF13113.7; DUF3970; Protein of<br>unknown function<br>(DUF3970)(86.08/3.00e+00)                                                                                                                                                                                                                                                                                                                                                         | hp                                                   |
| 75 | 72120 | 71452 | - | ATP-dependent Clp protease<br>proteolytic subunit 2 [ <i>Bacillus</i><br>phage pW2]<br><br>ATP-dependent Clp protease<br>proteolytic subunit 2 [ <i>Bacillus</i><br>phage vB_BcoS-136]<br><br>ATP-dependent Clp protease<br>proteolytic subunit 1 [ <i>Bacillus</i><br>phage pW2] | 1.0e-83<br><br>2.0e-83<br><br>1.0e-27 | S14_ClP_2<br>(7-178)<br><br>CLP_protease<br>(7-174) | 5.48e-30<br><br>4.47e-29 | KOG0840; ATP-dependent Clp protease,<br>proteolytic subunit [Posttranslational<br>modification, protein turnover,<br>chaperones] (99.92/6.60e-23)<br><br>d2zl4a_; c.14.1.1 (A:) Clp protease, ClpP<br>subunit { <i>Helicobacter pylori</i> [TaxId: 210]}<br>(99.91/1.10e-21)<br><br>d2f6ia1; c.14.1.1 (A:179-366) Clp<br>protease, ClpP subunit {Malaria parasite<br>( <i>Plasmodium falciparum</i> ) [TaxId: 5833]}<br>(99.9/3.30e-21) | ATP-dependent Clp<br>protease proteolytic<br>subunit |
| 76 | 72696 | 72133 | - | putative dihydrofolate<br>reductase [ <i>Bacillus</i> phage<br>PBC2]                                                                                                                                                                                                              | 2.0e-98<br><br>9.0e-77                | DHFR_1<br>(3-164)<br><br>FolA<br>(3-165)            | 3.53e-65<br><br>3.13e-46 | d4psya_; c.71.1.1 (A:) Dihydrofolate<br>reductase, prokaryotic type { <i>Escherichia</i><br><i>coli</i> [TaxId: 562]} (99.94/7.20e-25)                                                                                                                                                                                                                                                                                                  | dihydrofolate reductase                              |

|    |       |       |   |                                                                                                                                                                                        |                                                |                                                                                           |                                                 |                                                                                                                                                                                                                                                                                                                                                                                       |                                    |
|----|-------|-------|---|----------------------------------------------------------------------------------------------------------------------------------------------------------------------------------------|------------------------------------------------|-------------------------------------------------------------------------------------------|-------------------------------------------------|---------------------------------------------------------------------------------------------------------------------------------------------------------------------------------------------------------------------------------------------------------------------------------------------------------------------------------------------------------------------------------------|------------------------------------|
|    |       |       |   | <p>dihydrofolate reductase [<i>Bacillus</i> phage vB_BcoS-136]</p> <p>putative dihydrofolate reductase [<i>Bacillus</i> phage pW2]</p>                                                 | 1.0e-64                                        |                                                                                           |                                                 | <p>d3dfra_; c.71.1.1 (A:) Dihydrofolate reductase, prokaryotic type {<i>Lactobacillus casei</i> [TaxId: 1582]} (99.94/6.20e-24)</p> <p>d1j3ka_; c.71.1.1 (A:) Bifunctional enzyme dihydrofolate reductase-thymidylate synthase, DFR domain (99.92/5.40e-23)</p>                                                                                                                       |                                    |
| 77 | 72937 | 72698 | - | hp                                                                                                                                                                                     | hp                                             | -                                                                                         | -                                               | ('-', '-')                                                                                                                                                                                                                                                                                                                                                                            | hp                                 |
| 78 | 73782 | 72949 | - | <p>thymidylate synthase [<i>Bacillus</i> phage Izhevsk]</p> <p>thymidylate synthase [<i>Bacillus</i> phage pW2]</p> <p>thymidylate synthase [<i>Psychrobacillus</i> phage Perkons]</p> | <p>0.0e+00</p> <p>5.0e-154</p> <p>7.0e-114</p> | <p>Thymidylat_synt (8-275)</p> <p>TS_Pyrimidine_HMase (7-227)</p> <p>thym_sym (8-266)</p> | <p>1.11e-75</p> <p>1.06e-45</p> <p>4.32e-33</p> | <p>d4iw5a_; d.117.1.1 (A:) Thymidylate synthase {<i>Escherichia coli</i> [TaxId: 562]} (100/6.00e-56)</p> <p>d1bkpa_; d.117.1.1 (A:) Thymidylate synthase {<i>Bacillus subtilis</i> [TaxId: 1423]} (100/6.90e-56)</p> <p>d1j3kc_; d.117.1.1 (C:) Bifunctional enzyme dihydrofolate reductase-thymidylate synthase, TS domain {Malaria parasite (<i>Plasmodium</i>)(100/9.80e-56)}</p> | thymidylate synthase               |
| 79 | 74185 | 73811 | - | hp                                                                                                                                                                                     | hp                                             | -                                                                                         | -                                               | <p>d1z05a1; a.4.5.63 (A:10-80) Transcriptional regulator VC2007 N-terminal domain {<i>Vibrio cholerae</i> [TaxId: 666]} (98.5/4.10e-07)</p> <p>d3bp8a1; a.4.5.63 (A:11-81) Mlc protein N-terminal domain {<i>Escherichia coli</i> [TaxId: 562]} (98.48/6.10e-07)</p> <p>COG2345; COG2345; Predicted transcriptional regulator, ArsR family [Transcription]. (98.49/6.30e-07)</p>      | putative transcriptional regulator |
| 80 | 74676 | 74197 | - | transposase [ <i>Bacillus</i> phage Izhevsk]                                                                                                                                           | 1.0e-50                                        | -                                                                                         | -                                               | PF01710.17; HTH_Tnp_IS630; Transposase (98.76/7.20e-07)                                                                                                                                                                                                                                                                                                                               | HTH domain containing protein      |



|    |       |       |   |                                                                                                                                                                                                                     |                                              |   |   |                                                                                                                                                                                                                                                                                                                                                                         |                                       |
|----|-------|-------|---|---------------------------------------------------------------------------------------------------------------------------------------------------------------------------------------------------------------------|----------------------------------------------|---|---|-------------------------------------------------------------------------------------------------------------------------------------------------------------------------------------------------------------------------------------------------------------------------------------------------------------------------------------------------------------------------|---------------------------------------|
|    |       |       |   |                                                                                                                                                                                                                     |                                              |   |   | <p>COG2826; Tra8; Transposase and inactivated derivatives, IS30 family [Mobilome: prophages, transposons]. (98.55/2.90e-06)</p> <p>COG1675; TFA1; Transcription initiation factor IIE, alpha subunit [Transcription]. (98.03/3.60e-06)</p>                                                                                                                              |                                       |
| 81 | 75059 | 74691 | - | <p>putative 5'-nucleotidase [<i>Bacillus</i> phage Izhevsk]</p> <p>HAD-like domain containing protein [<i>Enterococcus</i> phage vB_EfaM_A2]</p> <p>HAD-like family phosphatase [<i>Enterococcus</i> phage iF6]</p> | <p>8.0e-58</p> <p>2.0e-17</p> <p>4.0e-17</p> | - | - | <p>d2obba1; c.108.1.25 (A:1-122) Hypothetical protein BT0820 {<i>Bacteroides thetaiotaomicron</i> [TaxId: 818]} (99.71/4.70e-16)</p> <p>PF06189.13; 5-nucleotidase; 5'-nucleotidase (99.1/7.70e-10)</p> <p>cd07499; HAD_CBAP; molecular class B acid phosphatases, similar to <i>Escherichia coli</i> AphA. class B acid phosphatases (CBAPs) have (99.05/4.20e-09)</p> | 5'-nucleotidase                       |
| 82 | 75521 | 75072 | - | <p>putative signal peptide-containing lipoprotein [<i>Bacillus</i> phage Izhevsk]</p>                                                                                                                               | 6.0e-12                                      | - | - | <p>PF16339.6; DUF4969; Domain of unknown function (DUF4969) (95.11/3.70e-02)</p> <p>COG5567 YifL; Predicted small periplasmic lipoprotein YifL (function unknown0 [Function unknown]. (94.01/0.11)</p>                                                                                                                                                                  | signal peptide-containing lipoprotein |
| 83 | 75706 | 75518 | - | <p>gp186 [<i>Bacillus</i> phage W.Ph.]</p> <p>gp33 [<i>Bacillus</i> phage TP21-L]</p>                                                                                                                               | <p>4.0e-06</p> <p>2.0e-04</p>                | - | - | <p>(' ', ' ')</p>                                                                                                                                                                                                                                                                                                                                                       | hp                                    |

|    |       |       |   |                                                                                                                                                                                                                                            |                                              |                                                                         |                                           |                                                                                                                                                                                                                                                                                                                                                                                        |                                       |
|----|-------|-------|---|--------------------------------------------------------------------------------------------------------------------------------------------------------------------------------------------------------------------------------------------|----------------------------------------------|-------------------------------------------------------------------------|-------------------------------------------|----------------------------------------------------------------------------------------------------------------------------------------------------------------------------------------------------------------------------------------------------------------------------------------------------------------------------------------------------------------------------------------|---------------------------------------|
| 84 | 76253 | 75810 | - | <p>GatB/YqeY domain-containing protein [<i>Bacillus</i> phage Izhevsk]</p> <p>glutamyl-tRNA amidotransferase [<i>Xanthomonas</i> phage XacN1]</p> <p>gp509 [<i>Bacillus</i> virus G]</p>                                                   | <p>5.0e-34</p> <p>9.0e-12</p> <p>4.0e-11</p> | YqeY (5-141)                                                            | 1.69e-19                                  | <p>COG1610; YqeY; Uncharacterized conserved protein YqeY [Function unknown] (99.96/2.80e-27)</p> <p>d1ng6a_; a.182.1.1 (A:) Hypothetical protein YqeY {<i>Bacillus subtilis</i> [TaxId: 1423]} (99.96/4.10e-27)</p> <p>PF09424.11; YqeY; Yqey-like protein (99.95/7.70e-26)</p>                                                                                                        | GatB/YqeY domain containing protein   |
| 85 | 76519 | 76322 | - | hp                                                                                                                                                                                                                                         | hp                                           | -                                                                       | -                                         | <p>PF10957.9; Spore_Cse60; Sporulation protein Cse60(99.75/2.00e-17)</p> <p>PF10750.10; DUF2536; Protein of unknown function (DUF2536) (98.03/1.10e-04)</p>                                                                                                                                                                                                                            | sporulation protein Cse60             |
| 86 | 76706 | 76512 | - | hp                                                                                                                                                                                                                                         | hp                                           | -                                                                       | -                                         | <p>COG2919; FtsB; Cell division protein FtsB [Cell cycle control, cell division, chromosome partitioning] (92.28/5.00e-01)</p>                                                                                                                                                                                                                                                         | putative cell division protein FtsB   |
| 87 | 78552 | 76816 | - | <p>nicotinate phosphoribosyltransferase [<i>Bacillus</i> phage Izhevsk]</p> <p>nicotinamide phosphoribosyl transferase [<i>Bacillus</i> phage vB_BcoS-136]</p> <p>nicotinamide phosphoribosyl transferase [<i>Bacillus</i> phage PBC2]</p> | <p>0.0e+00</p> <p>0.0e+00</p> <p>0.0e+00</p> | <p>nadV (1-578)</p> <p>PBEF_like (12-522)</p> <p>NAPRTase (187-560)</p> | <p>0e+00</p> <p>0e+00</p> <p>1.44e-33</p> | <p>cd01569; PBEF_like; pre-B-cell colony-enhancing factor (PBEF)-like. The mammalian members of this group of nicotinate phosphoribo (100.0/6.00e-68)</p> <p>cd01401; PncB_like; Nicotinate phosphoribosyltransferase (NAPRTase), related to PncB. Nicotinate phosphoribosyltransferase cataly (100.0/2.40e-51)</p> <p>KOG2511; Nicotinic acid phosphoribosyltransferase [Coenzyme</p> | nicotinate phosphoribosyl transferase |

|    |       |       |   |                                                                                                                                                                                                                                          |                                       |                                                                    |                                          |                                                                                                                                                                                                                                                                                                                                                                                                                                                             |                                        |
|----|-------|-------|---|------------------------------------------------------------------------------------------------------------------------------------------------------------------------------------------------------------------------------------------|---------------------------------------|--------------------------------------------------------------------|------------------------------------------|-------------------------------------------------------------------------------------------------------------------------------------------------------------------------------------------------------------------------------------------------------------------------------------------------------------------------------------------------------------------------------------------------------------------------------------------------------------|----------------------------------------|
|    |       |       |   |                                                                                                                                                                                                                                          |                                       |                                                                    |                                          | transport and metabolism] (100.0/9.70e-48)                                                                                                                                                                                                                                                                                                                                                                                                                  |                                        |
| 88 | 78766 | 78572 | - | hp                                                                                                                                                                                                                                       | hp                                    | -                                                                  | -                                        | PF09629.11; YorP; YorP protein (98.69/3.90e-07)<br>COG5475; YodC; Uncharacterized conserved protein YodC, DUF2158 family [Function unknown]. (97.61/2.30e-03)<br>PF18354.2; SH3_18; CarS bacterial SH3 domain (97.15/4.00e-03)                                                                                                                                                                                                                              | YorP-like protein                      |
| 89 | 79025 | 78768 | - | hp                                                                                                                                                                                                                                       | hp                                    | -                                                                  | -                                        | PF09629.11; YorP; YorP protein (98.07/3.00e-05)                                                                                                                                                                                                                                                                                                                                                                                                             | YorP-like protein                      |
| 90 | 79896 | 79012 | - | phosphoribosylpyrophosphate synthetase [ <i>Bacillus</i> phage Izhevsk]<br><br>ribose-phosphate pyrophosphokinase [ <i>Bacillus</i> phage vB_BcoS-136]<br><br>putative ribose-phosphate pyrophosphokinase [ <i>Bacillus</i> phage BPS13] | 2.0e-93<br><br>6.0e-91<br><br>3.0e-71 | ribP_PPkin(8-276)<br><br>PRTases_typeI(133-264)<br><br>PrsA(9-286) | 5.15e-22<br><br>3.66e-07<br><br>1.57e-21 | KOG1448; Ribose-phosphate pyrophosphokinase [Nucleotide transport and metabolism, Amino acid transport and metabolism] (100.0/1.50e-42)<br><br>KOG1503; Phosphoribosylpyrophosphate synthetase-associated protein [Amino acid transport and metabolism, Nucleotide transport and (100.0/2.30e-42)<br><br>COG0462; PrsA; Phosphoribosylpyrophosphate synthetase [Nucleotide transport and metabolism, Amino acid transport and metabolism]. (100.0/3.90e-40) | phosphoribosylpyrophosphate synthetase |
| 91 | 80137 | 79898 | - | hp                                                                                                                                                                                                                                       | hp                                    | -                                                                  | -                                        | ('-', '-')                                                                                                                                                                                                                                                                                                                                                                                                                                                  | hp                                     |
| 92 | 80592 | 80179 | - | hp                                                                                                                                                                                                                                       | hp                                    | -                                                                  | -                                        | d1kfia4; d.129.2.1 (A:444-572)<br>Exocytosis-sensitive phosphoprotein, pp63/parafusin { <i>Ciliate (Paramecium tetraurelia)</i> [TaxId: 5888(86.89/4.20e+00)                                                                                                                                                                                                                                                                                                | hp                                     |
| 93 | 80887 | 80594 | - | hp                                                                                                                                                                                                                                       | hp                                    | -                                                                  | -                                        | ('-', '-')                                                                                                                                                                                                                                                                                                                                                                                                                                                  | hp                                     |
| 94 | 81153 | 80887 | - | hp                                                                                                                                                                                                                                       | hp                                    | -                                                                  | -                                        | ('-', '-')                                                                                                                                                                                                                                                                                                                                                                                                                                                  | hp                                     |

|    |       |       |   |                                                                                       |          |                                           |                          |                                                                                                                                             |                                                |
|----|-------|-------|---|---------------------------------------------------------------------------------------|----------|-------------------------------------------|--------------------------|---------------------------------------------------------------------------------------------------------------------------------------------|------------------------------------------------|
| 95 | 82465 | 81158 | - | DNA ligase [ <i>Bacillus</i> phage PBC2]                                              | 0.0e+00  | 30<br>(5-426)                             | 1.93e-41                 | KOG0967; ATP-dependent DNA ligase I [Replication, recombination and repair] (100.0/1.70e-57)                                                | ATP-dependent DNA ligase                       |
|    |       |       |   | DNA ligase, ATP-dependent [ <i>Bacillus</i> phage vB_BanS-Tsamsa]                     | 0.0e+00  | CDC9<br>(106-430)                         | 4.22e-32                 | KOG0966; ATP-dependent DNA ligase IV [Replication, recombination and repair] (100.0/2.30e-56)                                               |                                                |
|    |       |       |   | DNA ligase [ <i>Bacillus</i> phage Izhevsk]                                           | 0.0e+00  | Adenylation_kDNA_ligase_like<br>(139-335) | 6.69e-32                 | COG1793; CDC9; ATP-dependent DNA ligase [Replication, recombination and repair]. (100.0/1.90e-45)                                           |                                                |
| 96 | 83086 | 82484 | - | ATP-dependent Clp protease proteolytic subunit 1 [ <i>Bacillus</i> phage pW2]         | 4.0e-87  | S14_ClP_2<br>(26-192)                     | 6.42e-20                 | KOG0840; ATP-dependent Clp protease, proteolytic subunit [Posttranslational modification, protein turnover, chaperones] (99.93/1.80e-23)    | ATP-dependent Clp protease proteolytic subunit |
|    |       |       |   | putative Clp endopeptidase [ <i>Bacillus</i> phage PBC2]                              | 6.0e-79  | ClpP<br>(55-200)                          | 1.06e-16                 | d2zl4a_; c.14.1.1 (A:) Clp protease, ClpP subunit [ <i>Helicobacter pylori</i> [TaxId: 210]] (99.92/8.90e-23)                               |                                                |
|    |       |       |   | ATP-dependent Clp protease proteolytic subunit 1 [ <i>Bacillus</i> phage vB_BcoS-136] | 2.0e-64  | CLP_protease<br>(22-196)                  | 1.78e-15                 | d2f6ia1; c.14.1.1 (A:179-366) Clp protease, ClpP subunit [Malaria parasite ( <i>Plasmodium falciparum</i> ) [TaxId: 5833]] (99.92/2.10e-22) |                                                |
| 97 | 83419 | 83123 | - | hp                                                                                    | hp       | -                                         | -                        | PF11305.9; DUF3107; Protein of unknown function (DUF3107) (94.92/2.20e-01)                                                                  | hp                                             |
| 98 | 84424 | 83432 | - | AAA family ATPase domain-containing protein [ <i>Bacillus</i> phage Izhevsk]          | 9.0e-134 | COG4639<br>(7-141)                        | 4.51e-20                 | COG4639; COG4639; Predicted kinase [General function prediction only]. (99.53/1.50e-12)                                                     | polynucleotide kinase                          |
|    |       |       |   |                                                                                       | 1.0e-125 | AAA_33<br>(9-136)                         | 5.89e-17<br><br>1.15e-09 |                                                                                                                                             |                                                |

|     |       |       |   |                                                                                                                                                                                                          |                                          |                                                                                                     |                                          |                                                                                                                                                                                                                                                                                                                                                                       |                                    |
|-----|-------|-------|---|----------------------------------------------------------------------------------------------------------------------------------------------------------------------------------------------------------|------------------------------------------|-----------------------------------------------------------------------------------------------------|------------------------------------------|-----------------------------------------------------------------------------------------------------------------------------------------------------------------------------------------------------------------------------------------------------------------------------------------------------------------------------------------------------------------------|------------------------------------|
|     |       |       |   | polynucleotide kinase<br>[ <i>Bacillus</i> phage vB_BcoS-136]<br><br>polynucleotide kinase<br>[ <i>Bacillus</i> phage pW2]                                                                               | 6.0e-115                                 | tRNA_CCA_actino<br>(183-295)<br><br>selen_PSTK<br>(10-144)                                          | 6.07e-09                                 | d1knqa_ ; c.37.1.17 (A:) Gluconate kinase<br>{ <i>Escherichia coli</i> [TaxId: 562]}<br>(99.54/1.90e-12)<br><br>KOG3062; RNA polymerase II elongator<br>associated protein [General function<br>prediction only] (99.44/3.00e-12)                                                                                                                                     |                                    |
| 99  | 85755 | 84475 | - | 2'-5' RNA ligase [ <i>Bacillus</i><br>phage PBC2]<br><br>RNA ligase [ <i>Bacillus</i> phage<br>vB_BcoS-136]<br><br>RNA ligase domain protein<br>[ <i>Vibrio</i> phage<br>2.275.O._10N.286.54.E11]        | 0.0e+00<br><br>0.0e+00<br><br>7.0e-78    | RNA_lig_DRB009<br>4<br>(5-186)<br><br>PHA02142<br>(5-114)                                           | 2.32e-13<br><br>9.70e-04                 | d1xdna_ ; d.142.2.4 (A:) RNA editing<br>ligase MP52 { <i>Trypanosoma (Trypanosoma</i><br><i>brucei</i> ) [TaxId: 5691]} (99.9/6.00e-23)<br><br>d1s68a_ ; d.142.2.4 (A:) RNA ligase 2, N-<br>terminal domain {Bacteriophage T4<br>[TaxId: 10665]} (99.81/4.10e-19)<br><br>PF09511.11; RNA_lig_T4_1; RNA ligase<br>(99.52/2.50e-13)                                     | RNA ligase                         |
| 100 | 86915 | 86055 | - | putative subtilisin-like protein<br>[ <i>Bacillus</i> phage PBC2]<br><br>serine peptidase S8 [ <i>Bacillus</i><br>phage Izhevsk]<br><br>putative subtilisin-like protein<br>[ <i>Bacillus</i> phage pW2] | 1.0e-178<br><br>1.0e-170<br><br>5.0e-149 | Peptidases_S8_Subt<br>ilisin_subset<br>(40-264)<br><br>AprE<br>(10-268)<br><br>PTZ00262<br>(41-286) | 5.12e-83<br><br>1.87e-38<br><br>7.75e-21 | d1r6va_ ; c.41.1.1 (A:) Fervidolysin<br>{ <i>Fervidobacterium pennivorans</i> [TaxId:<br>93466]} (100.0/9.90e-33)<br><br>d1supa_ ; c.41.1.1 (A:) Subtilisin { <i>Bacillus</i><br><i>amyloliquefaciens</i> , Novo/BPN' [TaxId:<br>1390]} (100.0/4.00e-32)<br><br>d1gcia_ ; c.41.1.1 (A:) Subtilisin { <i>Bacillus</i><br><i>lentus</i> [TaxId: 1467]} (100.0/5.40e-32) | subtilisin-like serine<br>protease |
| 101 | 87512 | 86922 | - | putative nucleotidyltransferase<br>[ <i>Bacillus</i> phage Izhevsk]<br><br>gp109 [ <i>Bacillus</i> virus G]<br><br>Polymerase, nucleotidyl<br>transferase domain containing                              | 1.0e-92<br>3.0e-61<br>5.0e-37            | NT_KNTase_like<br>(6-56)<br><br>YcgL<br>(12-150)                                                    | 1.23e-04<br><br>9.81e-04                 | PF10127.10; RlaP; RNA repair pathway<br>DNA polymerase beta family(99.81/6.10e-<br>19)<br><br>COG3541; YcgL; Predicted<br>nucleotidyltransferase [General function<br>prediction only].(99.67/2.00e-15)                                                                                                                                                               | nucleotidyltransferase             |

|     |       |       |   |                                                                                                                                                                                                                                                      |                                              |                                             |                                 |                                                                                                                                                                                                                                                                                                                                                                     |                                     |
|-----|-------|-------|---|------------------------------------------------------------------------------------------------------------------------------------------------------------------------------------------------------------------------------------------------------|----------------------------------------------|---------------------------------------------|---------------------------------|---------------------------------------------------------------------------------------------------------------------------------------------------------------------------------------------------------------------------------------------------------------------------------------------------------------------------------------------------------------------|-------------------------------------|
|     |       |       |   | protein [uncultured <i>Caudovirales</i> phage]                                                                                                                                                                                                       |                                              |                                             |                                 | PF14540.7; NTF-like; Nucleotidyltransferase-like(98.82/1.50e-08)                                                                                                                                                                                                                                                                                                    |                                     |
| 102 | 88167 | 87523 | - | <p>chaperone protein [<i>Bacillus</i> phage vB_BcoS-136]</p> <p>chaperone protein DnaJ [uncultured <i>Caudovirales</i> phage]</p> <p>DnaJ DnaJ-class molecular chaperone with C-terminal Zn finger domain [uncultured <i>Caudovirales</i> phage]</p> | <p>7.0e-24</p> <p>1.0e-09</p> <p>2.0e-07</p> | <p>DnaJ (167-208)</p> <p>djlA (133-192)</p> | <p>2.52e-12</p> <p>3.28e-10</p> | <p>KOG0719; Molecular chaperone (DnaJ superfamily) [Posttranslational modification, protein turnover, chaperones] (98.36/1.00e-06)</p> <p>KOG3442; Uncharacterized conserved protein [Function unknown] (98.49/1.20e-06)</p> <p>KOG0723; Molecular chaperone (DnaJ superfamily) [Posttranslational modification, protein turnover, chaperones] (98.49/1.40e-06)</p> | DnaJ domain containing protein      |
| 103 | 88441 | 88223 | - | hp                                                                                                                                                                                                                                                   | hp                                           | -                                           | -                               | KOG3735; Tropomodulin and leiomodulin [Cytoskeleton](80.21/4.40e+00)                                                                                                                                                                                                                                                                                                | hp                                  |
| 104 | 88672 | 88454 | - | <p>conserved phage protein [<i>Bacillus</i> phage Gamma]</p> <p>putative membrane protein [<i>Bacillus</i> phage Bcp1]</p> <p>putative membrane protein [<i>Bacillus</i> phage vB_BceM_Bc431v3]</p>                                                  | <p>2.0e-06</p> <p>4.0e-05</p> <p>7.0e-05</p> | -                                           | -                               | PF13239.7; 2TM; 2TM domain(86.7/6.30e+00)                                                                                                                                                                                                                                                                                                                           | hp                                  |
| 105 | 89054 | 88812 | - | hp                                                                                                                                                                                                                                                   | hp                                           | -                                           | -                               | ('-', '-')                                                                                                                                                                                                                                                                                                                                                          | hp                                  |
| 106 | 89420 | 89067 | - | putative GTP binding protein [ <i>Bacillus</i> phage PBC4]                                                                                                                                                                                           | <p>1.0e-37</p> <p>1.0e-36</p>                | DUF2493 (1-66)                              | 1.50e-11                        | COG0758; Smf; Predicted Rossmann fold nucleotide-binding protein DprA/Smf involved in DNA uptake (99.83/1.40e-18)                                                                                                                                                                                                                                                   | putative nucleotide-binding protein |

|     |       |       |   |                                                                                                                                                                                                                     |                                       |                                   |                          |                                                                                                                                                                                                                                                                 |                  |
|-----|-------|-------|---|---------------------------------------------------------------------------------------------------------------------------------------------------------------------------------------------------------------------|---------------------------------------|-----------------------------------|--------------------------|-----------------------------------------------------------------------------------------------------------------------------------------------------------------------------------------------------------------------------------------------------------------|------------------|
|     |       |       |   | putative GTP binding protein<br>[ <i>Bacillus</i> phage pW4]<br><br>putative ssDNA binding<br>protein [ <i>Bacillus</i> phage<br>vB_BspM_MarvelLand]                                                                | 8.0e-35                               |                                   |                          | d2nx2a1; c.129.1.2 (A:2-177) Hypothetical<br>protein YpsA { <i>Bacillus subtilis</i> [TaxId:<br>1423]} (99.82/2.40e-18)<br><br>COG4474; YoqJ; Uncharacterized SPBc2<br>prophage-derived protein YoqJ<br>[Mobilome: prophages, transposons].<br>(99.77/9.50e-17) |                  |
| 107 | 89836 | 89417 | - | hp                                                                                                                                                                                                                  | hp                                    | -                                 | -                        | ('-', '-')                                                                                                                                                                                                                                                      | hp               |
| 108 | 90045 | 89833 | - | hp                                                                                                                                                                                                                  | hp                                    | -                                 | -                        | ('-', '-')                                                                                                                                                                                                                                                      | hp               |
| 109 | 90600 | 90097 | - | hp                                                                                                                                                                                                                  | hp                                    | -                                 | -                        | ('-', '-')                                                                                                                                                                                                                                                      | hp               |
| 110 | 90965 | 90600 | - | host recBCD nuclease<br>inhibitor [ <i>Enterococcus</i> phage<br>EF-P29]<br><br>inhibitor of recBCD nuclease<br>[ <i>Escherichia</i> phage ECA2]<br><br>putative 5.9 protein [ <i>Yersinia</i><br>phage phiYeO3-12] | 1.0e-07<br><br>6.0e-07<br><br>6.0e-07 | PHA00442<br>(83-121)              | 2.97e-07                 | ('-', '-')                                                                                                                                                                                                                                                      | hp               |
| 111 | 91292 | 91017 | - | -                                                                                                                                                                                                                   | -                                     | -                                 | -                        | ('-', '-')                                                                                                                                                                                                                                                      | hp               |
| 112 | 91521 | 91312 | - | -                                                                                                                                                                                                                   | -                                     | -                                 | -                        | PF00794.19; PI3K_rbd; PI3-kinase family,<br>ras-binding domain (61.01/5.20e+00)                                                                                                                                                                                 | hp               |
| 113 | 91794 | 91522 | - | hp                                                                                                                                                                                                                  | hp                                    | -                                 | -                        | cd00927; Cyt_c_Oxidase_VIc;<br>Cytochrome c oxidase subunit VIc.<br>Cytochrome c oxidase (CcO), the terminal<br>oxidase in the respiratory (86.04/1.40e+00)                                                                                                     | hp               |
| 114 | 92047 | 91787 | - | hp                                                                                                                                                                                                                  | hp                                    | -                                 | -                        | PF15597.7; Imm59; Immunity protein<br>59(63.14/6.80e+00)                                                                                                                                                                                                        | hp               |
| 115 | 92616 | 92059 | - | putative guanylate kinase<br>[ <i>Bacillus</i> phage PBC2]                                                                                                                                                          | 8.0e-72<br><br>2.0e-71                | guanyl_kin<br>(3-164)<br><br>GMPK | 6.88e-43<br><br>3.03e-34 | d1kjwa2; c.37.1.1 (A:526-724) Guanylate<br>kinase-like domain of Psd-95 {Norway rat<br>( <i>Rattus norvegicus</i> ) [TaxId: 10116]}<br>(99.88/1.30e-19)                                                                                                         | guanylate kinase |

|     |       |       |   |                                                                                                                 |                        |                                                 |                          |                                                                                                                                                                                                                                                                                                                  |                             |
|-----|-------|-------|---|-----------------------------------------------------------------------------------------------------------------|------------------------|-------------------------------------------------|--------------------------|------------------------------------------------------------------------------------------------------------------------------------------------------------------------------------------------------------------------------------------------------------------------------------------------------------------|-----------------------------|
|     |       |       |   | guanylate kinase [ <i>Bacillus</i> phage Izhevsk]<br><br>putative guanylate kinase [ <i>Bacillus</i> phage pW2] | 4.0e-69                | (3-120)<br><br>GuKc (10-164)                    | 8.77e-21                 | d1t0hb_; c.37.1.1 (B:) Guanylate kinase-like domain of the L-type calcium channel {Norway rat ( <i>Rattus norvegicus</i> ) [TaxId: 10116]} (99.86/1.60e-19)<br><br>COG0194; Gmk; Guanylate kinase [Nucleotide transport and metabolism]. (99.87/9.00e-19)                                                        |                             |
| 116 | 92786 | 92616 | - | hp                                                                                                              | hp                     | -                                               | -                        | ('-', '-')                                                                                                                                                                                                                                                                                                       | hp                          |
| 117 | 93054 | 92788 | - | putative signal peptide-containing lipoprotein [ <i>Bacillus</i> phage Izhevsk]                                 | 7.0e-08                | -                                               | -                        | ('-', '-')                                                                                                                                                                                                                                                                                                       | hp                          |
| 118 | 93315 | 93067 | - | gp48 [ <i>Bacillus</i> virus G]                                                                                 | 9.0e-11                | -                                               | -                        | ('-', '-')                                                                                                                                                                                                                                                                                                       | hp                          |
| 119 | 93851 | 93345 | - | -                                                                                                               | -                      | -                                               | -                        | ('-', '-')                                                                                                                                                                                                                                                                                                       | hp                          |
| 120 | 94070 | 93861 | - | -                                                                                                               | -                      | -                                               | -                        | COG0776; HimA; Bacterial nucleoid DNA-binding protein [Replication, recombination and repair]. (95.74/3.90e-02)<br><br>d1p71a_; a.55.1.1 (A:) HU protein { <i>Anabaena</i> sp. [TaxId: 1167]} (95.58/4.90e-02)<br><br>d1mula_; a.55.1.1 (A:) HU protein { <i>Escherichia coli</i> [TaxId: 562]} (95.44/5.80e-02) | HU-like DNA-binding protein |
| 121 | 94287 | 94081 | - | -                                                                                                               | -                      | -                                               | -                        | ('-', '-')                                                                                                                                                                                                                                                                                                       | hp                          |
| 122 | 95202 | 94387 | - | trimeric dUTP diphosphatase [ <i>Bacillus</i> phage Izhevsk]                                                    | 1.0e-99<br><br>2.0e-51 | Dut (104-271)<br><br>trimeric_dUTPase (124-203) | 7.55e-16<br><br>2.15e-09 | KOG3370; dUTPase [Nucleotide transport and metabolism] (99.94/4.40e-26)                                                                                                                                                                                                                                          | dUTPase                     |



|     |       |       |   |                                                                                                                                                                                                       |                                         |                                                           |                           |                                                                                                                                                                                                                                                                                                                                                                                  |                                                             |
|-----|-------|-------|---|-------------------------------------------------------------------------------------------------------------------------------------------------------------------------------------------------------|-----------------------------------------|-----------------------------------------------------------|---------------------------|----------------------------------------------------------------------------------------------------------------------------------------------------------------------------------------------------------------------------------------------------------------------------------------------------------------------------------------------------------------------------------|-------------------------------------------------------------|
|     |       |       |   | deoxyuridine 5'-triphosphate nucleotidohydrolase [ <i>Bacillus</i> phage vB_BcoS-136]<br><br>putative DUTP diphosphatase Dut [ <i>Brevibacillus</i> phage Sundance]                                   | 9.0e-42                                 | Dut<br>(123-271)                                          | 8.62e-07                  | COG0756; Dut; dUTPase [Nucleotide transport and metabolism, Defense mechanisms]. (99.93/3.00e-24)<br><br>d1sixa1; b.85.4.1 (A:1-144) Deoxyuridine 5'-triphosphate nucleotidohydrolase (dUTPase) { <i>Mycobacterium tuberculosis</i> } (99.92/1.20e-23)                                                                                                                           |                                                             |
| 123 | 95590 | 95279 | - | glutaredoxin/thioredoxin [ <i>Bacillus</i> phage BigBertha]<br><br>thioredoxin [ <i>Bacillus</i> phage Troll]<br><br>thioredoxin [ <i>Bacillus</i> phage Riley]                                       | 4.0e-07<br><br>5.0e-07<br><br>5.0e-07   | TRX_family<br>(10-79)                                     | 4.96e-06                  | d1a8la1; c.47.1.2 (A:1-119) Protein disulfide isomerase, PDI { <i>Pyrococcus furiosus</i> [TaxId: 2261]} (99.62/3.00e-14)<br><br>d1dbya1; c.47.1.1 (A:2-107) Thioredoxin {Green alga ( <i>Chlamydomonas reinhardtii</i> ) [TaxId: 3055]} (99.62/4.00e-14)<br><br>d3diea1; c.47.1.1 (A:1-104) Thioredoxin { <i>Staphylococcus aureus</i> [TaxId: 1280]} (99.61/8.10e-14)          | thioredoxin                                                 |
| 124 | 96738 | 95674 | - | ribonucleotide-diphosphate reductase [ <i>Bacillus</i> phage PBC2]<br><br>putative ribonucleotide-diphosphate reductase [ <i>Brevibacillus</i> phage Sundance]<br><br>gp83 [ <i>Bacillus</i> virus G] | 0.0e+00<br><br>4.0e-129<br><br>2.0e-123 | RNR_1b_NrdF<br>(28-350)<br><br>Ribonuc_red_sm<br>(30-311) | 4.75e-173<br><br>6.99e-91 | KOG1567; Ribonucleotide reductase, beta subunit [Nucleotide transport and metabolism] (100.0/2.40e-47)<br><br>COG0208; NrdF; Ribonucleotide reductase beta subunit, ferritin-like domain [Nucleotide transport and metabolism]. (100.0/6.30e-45)<br><br>d3dhza_; a.25.1.2 (A:) Ribonucleotide reductase R2 { <i>Corynebacterium ammoniagenes</i> [TaxId: 1697]} (100.0/3.50e-43) | ribonucleoside-diphosphate reductase class 1b, beta subunit |

|     |       |       |   |                                                                                                                                                                                                                                                                         |                                              |                                                                                 |                                        |                                                                                                                                                                                                                                                                                                                                                                                                    |                                                                        |
|-----|-------|-------|---|-------------------------------------------------------------------------------------------------------------------------------------------------------------------------------------------------------------------------------------------------------------------------|----------------------------------------------|---------------------------------------------------------------------------------|----------------------------------------|----------------------------------------------------------------------------------------------------------------------------------------------------------------------------------------------------------------------------------------------------------------------------------------------------------------------------------------------------------------------------------------------------|------------------------------------------------------------------------|
| 125 | 98841 | 96754 | - | <p>ribonucleotide reductase [<i>Bacillus</i> phage PBC2]</p> <p>NrdE-like class 1b ribonucleotide reductase, alpha subunit [<i>Bacillus</i> phage Izhevsk]</p> <p>putative ribonucleoside-diphosphate reductase subunit alpha [<i>Brevibacillus</i> phage Sundance]</p> | <p>0.0e+00</p> <p>0.0e+00</p> <p>0.0e+00</p> | <p>PRK07632 (3-695)</p> <p>Ribonuc_red_lgC (163-679)</p> <p>RNR_I (113-682)</p> | <p>0e+00</p> <p>0e+00</p> <p>0e+00</p> | <p>KOG1112; Ribonucleotide reductase, alpha subunit [Nucleotide transport and metabolism] (100.0/3.80e-104)</p> <p>d1peqa2; c.7.1.2 (A:175-699) R1 subunit of ribonucleotide reductase, C-terminal domain {<i>Salmonella</i> typhimurium [TaxId: 90371]} (100.0/1.50e-92)</p> <p>COG0209; NrdA; Ribonucleotide reductase alpha subunit [Nucleotide transport and metabolism]. (100.0/1.00e-91)</p> | <p>ribonucleotide-diphosphate reductase class 1b, alpha subunit</p>    |
| 126 | 99057 | 98860 | - | hp                                                                                                                                                                                                                                                                      | hp                                           | -                                                                               | -                                      | d1ix2a_; b.1.18.17 (A:) Copper resistance protein C (CopC, PcoC) { <i>Escherichia coli</i> [TaxId: 562]} (75.26/4.70e+00)                                                                                                                                                                                                                                                                          | hp                                                                     |
| 127 | 99436 | 99062 | - | <p>putative ribonucleotide reductase [<i>Bacillus</i> phage PBC2]</p> <p>NrdI-like protein of class Ib ribonucleotide reductase operon [<i>Bacillus</i> phage Izhevsk]</p> <p>gp81 [<i>Bacillus</i> virus G]</p>                                                        | <p>2.0e-67</p> <p>2.0e-44</p> <p>2.0e-38</p> | <p>nrdI (1-117)</p> <p>Flavodoxin_NdrI (1-118)</p>                              | <p>9.93e-41</p> <p>1.46e-32</p>        | <p>COG1780; NrdI; Protein involved in ribonucleotide reduction [Nucleotide transport and metabolism]. (99.82/7.60e-18)</p> <p>d1rlja1; c.23.5.7 (A:1-126) Flavoprotein NrdI {<i>Bacillus subtilis</i> [TaxId: 1423]} (99.74/7.90e-16)</p> <p>d1ykga1; c.23.5.2 (A:63-208) Sulfite reductase alpha-component CysJ N-terminal domain {<i>Escherichia coli</i> [TaxId: 562]} (99.62/8.80e-14)</p>     | <p>ribonucleoside-diphosphate reductase assembly flavoprotein NrdI</p> |
| 128 | 99963 | 99523 | - | DUF1653 domain-containing protein [ <i>Bacillus</i> phage Izhevsk]                                                                                                                                                                                                      | 7.0e-53                                      | DUF1653 (1-106)                                                                 | 5.09e-09                               | COG4728; COG4728; Uncharacterized protein, DUF1653 family [Function unknown]. (99.83/1.90e-20)                                                                                                                                                                                                                                                                                                     | DUF1653 domain-containing protein                                      |

|     |        |        |   |                                                                                                                                                                                                              |                                       |                                                          |                                             |                                                                                                                                                                                                                                                                                                                                                   |                                        |
|-----|--------|--------|---|--------------------------------------------------------------------------------------------------------------------------------------------------------------------------------------------------------------|---------------------------------------|----------------------------------------------------------|---------------------------------------------|---------------------------------------------------------------------------------------------------------------------------------------------------------------------------------------------------------------------------------------------------------------------------------------------------------------------------------------------------|----------------------------------------|
|     |        |        |   | putative TonB box-like protein [ <i>Brevibacillus</i> phage Sundance]                                                                                                                                        | 2.0e-08                               |                                                          |                                             | PF07866.12; DUF1653; Protein of unknown function (DUF1653) (99.56/2.50e-14)                                                                                                                                                                                                                                                                       |                                        |
| 129 | 100865 | 100038 | - | putative HflC/HflK family inner membrane protein [ <i>Brevibacillus</i> phage Sundance]<br><br>HflK protein [ <i>Bacillus</i> phage vB_BcoS-136]<br><br>membrane protein [ <i>Enterococcus</i> phage PEF771] | 2.0e-79<br><br>9.0e-79<br><br>2.0e-50 | SPFH_prohibitin (29-223)<br><br>Band_7 (29-208)          | 2.68e-38<br><br>1.16e-18                    | KOG3083; Prohibitin [Posttranslational modification, protein turnover, chaperones] (100.0/1.70e-32)<br><br>KOG3090; Prohibitin-like protein [Posttranslational modification, protein turnover, chaperones] (100.0/1.80e-32)<br><br>KOG2962; Prohibitin-related membrane protease subunits [General function prediction only] (100.0/3.50e-30)     | prohibitin family protein              |
| 130 | 103240 | 101099 | - | DNA topoisomerase [ <i>Bacillus</i> phage PBC2]<br><br>DNA gyrase subunit A [ <i>Bacillus</i> phage Izhevsk]<br><br>DNA topoisomerase [ <i>Bacillus</i> phage pW2]                                           | 0.0e+00<br><br>0.0e+00<br><br>0.0e+00 | GyrA (4-695)<br><br>PRK05561 (4-656)<br><br>gyrA (4-713) | 4.51e-167<br><br>1.66e-166<br><br>1.65e-144 | COG0188; GyrA; DNA gyrase/topoisomerase IV, subunit A [Replication, recombination and repair]. (100.0/4.30e-118)<br><br>d3k9fa_; e.11.1.1 (A:) DNA Gyrase A { <i>Pneumococcus (Streptococcus pneumoniae)</i> [TaxId: 1313]} (100.0/4.80e-100)<br><br>d4ckka_; e.11.1.1 (A:) DNA Gyrase A { <i>Escherichia coli</i> [TaxId: 562]} (100.0/1.60e-96) | DNA gyrase/topoisomerase IV, subunit A |
| 131 | 105247 | 103286 | - | DNA gyrase subunit B [ <i>Bacillus</i> phage vB_BcoS-136]<br><br>putative DNA gyrase [ <i>Geobacillus</i> virus E3]                                                                                          | 0.0e+00<br><br>0.0e+00                | GyrB (1-643)<br><br>TOP2c (33-644)                       | 9.70e-161<br><br>2.96e-139<br><br>1.68e-50  | COG0187; GyrB; DNA gyrase/topoisomerase IV, subunit B [Replication, recombination and repair]. (100.0/4.80e-105)                                                                                                                                                                                                                                  | DNA gyrase/topoisomerase IV, subunit B |

|     |        |        |   |                                                                                                                                                                                                                                            |                                        |                                      |          |                                                                                                                                                                                                                                                                                                                                                                                    |                                    |
|-----|--------|--------|---|--------------------------------------------------------------------------------------------------------------------------------------------------------------------------------------------------------------------------------------------|----------------------------------------|--------------------------------------|----------|------------------------------------------------------------------------------------------------------------------------------------------------------------------------------------------------------------------------------------------------------------------------------------------------------------------------------------------------------------------------------------|------------------------------------|
|     |        |        |   | DNA topoisomerase [ <i>Bacillus</i> phage PBC2]                                                                                                                                                                                            | 0.0e+00                                | TOPRIM_TopoIIA<br>_GyrB<br>(429-550) |          | KOG0355; DNA topoisomerase type II<br>[Chromatin structure and dynamics]<br>(100.0/6.30e-65)<br><br>d3k9fc_; e.78.1.1 (C:) DNA gyrase beta-<br>prime domain { <i>Pneumococcus</i><br>( <i>Streptococcus pneumoniae</i> ) [TaxId:<br>1313]} (100.0/2.60e-57)                                                                                                                        |                                    |
| 132 | 106068 | 105307 | - | putative nucleotidyltransferase<br>[ <i>Bacillus</i> phage Izhevsk]<br><br>putative nucleotidyltransferase<br>[ <i>Bacillus</i> phage vB_BcoS-<br>136]<br><br>putative nucleotidyltransferase<br>[ <i>Brevibacillus</i> phage<br>Sundance] | 9.0e-119<br><br>5.0e-77<br><br>1.0e-61 | Nuc-transf<br>(9-118)                | 2.19e-04 | PF10127.10; RlaP; RNA repair pathway<br>DNA polymerase beta family<br>(99.98/4.40e-31)<br><br>COG3541; YcgL; Predicted<br>nucleotidyltransferase [General function<br>prediction only]. (99.97/5.60e-29)<br><br>d1knya2; d.218.1.1 (A:1-125) Kanamycin<br>nucleotidyltransferase (KNTase), N-<br>terminal domain { <i>Staphylococcus aureus</i><br>[TaxId: 1280]} (97.24/1.10e-03) | putative<br>nucleotidyltransferase |
| 133 | 106692 | 106198 | - | hp                                                                                                                                                                                                                                         | hp                                     | -                                    | -        | COG1590; Tyw3; tRNA (Phe)<br>wybutosine-synthesizing methylase Tyw3<br>[Translation, ribosomal structure and<br>biogenesis]. (96.44/1.70e-03)<br><br>PF02676.15; TYW3; Methyltransferase<br>TYW3(96.43/2.90e-03)<br><br>KOG1228; Uncharacterized conserved<br>protein [Function unknown](96.45/3.30e-<br>03)                                                                       | hp                                 |
| 134 | 107300 | 106692 | - | NADAR family protein<br>[ <i>Bacillus</i> phage pW2]                                                                                                                                                                                       | 6.0e-80                                | DUF1768<br>(46-196)                  | 8.25e-50 | COG3236; ybiA; N-glycosylase of 5-<br>amino-6-ribosylamino-2,4-                                                                                                                                                                                                                                                                                                                    | NADAR family<br>protein            |

|     |        |        |   |                                                                        |         |                         |          |                                                                                                                                                    |                                     |
|-----|--------|--------|---|------------------------------------------------------------------------|---------|-------------------------|----------|----------------------------------------------------------------------------------------------------------------------------------------------------|-------------------------------------|
|     |        |        |   | GTP cyclohydrolase [ <i>Serratia</i> phage BF]                         | 4.0e-39 | ribofla_fusion (45-196) | 1.91e-47 | pyrimidinedione 5-phosphate (riboflavin biosynthesis damage control) (100.0/1.50e-35)                                                              |                                     |
|     |        |        |   | Uncharacterized protein COG3236 [ <i>Yersinia</i> phage fHe-Yen9-04]   | 4.0e-39 | ybiA (40-198)           | 3.92e-36 | d2b3wa1; d.336.1.1 (A:1-160) Hypothetical protein YbiA { <i>Escherichia coli</i> [TaxId: 562]} (100.0/2.90e-34)                                    |                                     |
|     |        |        |   |                                                                        |         |                         |          | PF08719.12; NADAR; NADAR domain (100.0/8.10e-32)                                                                                                   |                                     |
| 135 | 107760 | 107305 | - | hp                                                                     | hp      | -                       | -        | ('-', '-')                                                                                                                                         | hp                                  |
| 136 | 108367 | 107753 | - | hp                                                                     | hp      | -                       | -        | ('-', '-')                                                                                                                                         | hp                                  |
| 137 | 108596 | 108393 | - | -                                                                      | -       | -                       | -        | ('-', '-')                                                                                                                                         | hp                                  |
| 138 | 108876 | 108628 | - | hp                                                                     | hp      | -                       | -        | ('-', '-')                                                                                                                                         | hp                                  |
| 139 | 109058 | 108873 | - | uncharacterized conserved protein [ <i>Staphylococcus</i> phage SpaA1] | 8.0e-19 | -                       | -        | ('-', '-')                                                                                                                                         | hp                                  |
|     |        |        |   | gp243 [ <i>Bacillus</i> phage W.Ph.]                                   | 9.0e-11 |                         |          |                                                                                                                                                    |                                     |
| 140 | 109421 | 109062 | - | hp                                                                     | hp      | -                       | -        | ('-', '-')                                                                                                                                         | hp                                  |
| 141 | 109647 | 109408 | - | -                                                                      | -       | -                       | -        | cd01825; SGNH_hydrolase_peri1; SGNH_peri1; putative periplasmic member of the SGNH-family of hydrolases, a diverse family of lipa (74.83/2.50e+00) | hp                                  |
| 142 | 109865 | 109701 | - | -                                                                      | -       | -                       | -        | ('-', '-')                                                                                                                                         | hp                                  |
| 143 | 110129 | 109878 | - | hp                                                                     | hp      | -                       | -        | PF11360.9; DUF3110; Protein of unknown function (DUF3110)(92.1/4.50e-01)                                                                           | hp                                  |
| 144 | 110306 | 110148 | - | gp49 [ <i>Bacillus</i> phage TP21-L]                                   | 6.0e-10 | -                       | -        | d1lv3a_; g.39.1.9 (A:) Hypothetical zinc finger protein YacG { <i>Escherichia coli</i> [TaxId: 562]} (74.76/3.60e-01)                              | Zn-ribbon domain containing protein |

|     |        |        |   |    |    |   |   |                                                                                                                                                                                                                                                                                                                                                                                                                                   |                   |
|-----|--------|--------|---|----|----|---|---|-----------------------------------------------------------------------------------------------------------------------------------------------------------------------------------------------------------------------------------------------------------------------------------------------------------------------------------------------------------------------------------------------------------------------------------|-------------------|
| 145 | 110499 | 110320 | - | hp | hp | - | - | <p>d1pava_; d.68.3.3 (A:) Hypothetical protein Ta1170/Ta1414 {<i>Thermoplasma acidophilum</i> [TaxId: 2303]} (96.46/2.00e-02)</p> <p>COG0425; TusA; TusA-related sulfurtransferase [Posttranslational modification, protein turnover, chaperones]. (96.04/4.10e-02)</p> <p>cd03422; YedF; YedF is a bacterial SirA-like protein of unknown function. SirA (also known as UvrY, and YhhP) belongs to a family (95.96/6.50e-02)</p> | hp                |
| 146 | 110707 | 110528 | - | -  | -  | - | - | ('-', '-')                                                                                                                                                                                                                                                                                                                                                                                                                        | hp                |
| 147 | 111269 | 110733 | - | hp | hp | - | - | ('-', '-')                                                                                                                                                                                                                                                                                                                                                                                                                        | hp                |
| 148 | 111444 | 111271 | - | -  | -  | - | - | <p>PF00763.24; THF_DHGCYH; Tetrahydrofolate dehydrogenase/cyclohydrolase, catalytic domain (76.55/3.20e+00)</p>                                                                                                                                                                                                                                                                                                                   | hp                |
| 149 | 111607 | 111449 | - | hp | hp | - | - | ('-', '-')                                                                                                                                                                                                                                                                                                                                                                                                                        | hp                |
| 150 | 111783 | 111607 | - | hp | hp | - | - | ('-', '-')                                                                                                                                                                                                                                                                                                                                                                                                                        | hp                |
| 151 | 112351 | 111785 | - | hp | hp | - | - | <p>d1qp2a_; b.34.4.2 (A:) Photosystem I accessory protein E (PsaE) {<i>Nostoc</i> sp., strain pcc8009 [TaxId: 1180]} (99.96/6.30e-30)</p> <p>d4kt0e_; b.34.4.2 (E:) Photosystem I accessory protein E (PsaE) {<i>Synechocystis</i> sp. PCC 6803 [TaxId: 1148]} (99.94/2.00e-27)</p>                                                                                                                                               | PsaE-like protein |

|     |        |        |   |                                               |         |                                            |                          |                                                                                                                                                                                                                                                                                                                                                                                                                  |                                       |
|-----|--------|--------|---|-----------------------------------------------|---------|--------------------------------------------|--------------------------|------------------------------------------------------------------------------------------------------------------------------------------------------------------------------------------------------------------------------------------------------------------------------------------------------------------------------------------------------------------------------------------------------------------|---------------------------------------|
|     |        |        |   |                                               |         |                                            |                          | PF02427.18; PSI_PsaE; Photosystem I reaction centre subunit IV / PsaE(99.93/2.00e-26)                                                                                                                                                                                                                                                                                                                            |                                       |
| 152 | 112902 | 112348 | - | excinuclease [ <i>Bacillus</i> phage Izhevsk] | 3.0e-89 | GIY-YIG_UvrC_Cho (7-79)<br><br>UvrC (7-91) | 2.92e-16<br><br>1.41e-11 | COG0322; UvrC; Excinuclease UvrABC, nuclease subunit [Replication, recombination and repair]. (99.83/2.00e-19)<br><br>cd10435; GIY-YIG_RE_Eco29kI_like; Catalytic GIY-YIG domain of type II restriction endonucleases R.Eco29kI, R.Cfr42I, and similar (99.33/1.20e-11)<br><br>cd10453; GIY-YIG_RE_Cfr42I; Catalytic GIY-YIG domain of type II restriction enzyme R.Cfr42I and similar proteins.(99.32/1.40e-11) | GIY-YIG endonuclease                  |
| 153 | 113269 | 112895 | - | hp                                            | hp      | -                                          | -                        | ('-', '-')                                                                                                                                                                                                                                                                                                                                                                                                       | hp                                    |
| 154 | 113576 | 113271 | - | hp                                            | hp      | -                                          | -                        | ('-', '-')                                                                                                                                                                                                                                                                                                                                                                                                       | hp                                    |
| 155 | 113930 | 113586 | - | hp                                            | hp      | -                                          | -                        | PF16339.6; DUF4969; Domain of unknown function (DUF4969) (97.74/9.30e-05)<br><br>COG5567; YifL; Predicted small periplasmic lipoprotein YifL (function unknown0 [Function unknown]. (97.48/1.80e-04)<br><br>COG4808; YehR; Uncharacterized lipoprotein YehR, DUF1307 family [Function unknown]. (97.51/4.30e-04)                                                                                                 | signal peptide-containing lipoprotein |
| 156 | 114289 | 113939 | - | hp                                            | hp      | -                                          | -                        | d2rb6a1; b.38.1.6 (A:25-76)<br>Uncharacterized protein SO0963                                                                                                                                                                                                                                                                                                                                                    | signal peptide-containing lipoprotein |

|     |        |        |   |                                                                                                                                                                                                                     |                                       |                          |          |                                                                                                                                                                                                                                                                                                                                                                                                                                              |                                 |
|-----|--------|--------|---|---------------------------------------------------------------------------------------------------------------------------------------------------------------------------------------------------------------------|---------------------------------------|--------------------------|----------|----------------------------------------------------------------------------------------------------------------------------------------------------------------------------------------------------------------------------------------------------------------------------------------------------------------------------------------------------------------------------------------------------------------------------------------------|---------------------------------|
|     |        |        |   |                                                                                                                                                                                                                     |                                       |                          |          | { <i>Shewanella oneidensis</i> [TaxId: 70863]}<br>(99.46/6.40e-14)<br><br>d2k57a1; b.38.1.6 (A:2-53)<br>Uncharacterized protein PSPPH2109<br>{ <i>Pseudomonas syringae</i> [TaxId: 317]}<br>(99.45/9.10e-14)<br><br>d3bdua1; b.38.1.6 (A:2-54)<br>Uncharacterized protein ECA1013<br>{ <i>Erwinia carotovora</i> [TaxId: 554]}<br>(99.46/1.20e-13)                                                                                           |                                 |
| 157 | 114536 | 114306 | - | hp                                                                                                                                                                                                                  | hp                                    | -                        | -        | PF13179.7; DUF4006; Family of unknown function (DUF4006)(87.6/1.90e+00)                                                                                                                                                                                                                                                                                                                                                                      | hp                              |
| 158 | 115007 | 114549 | - | macro domain protein<br>[ <i>Bacillus</i> phage vB_BcoS-136]<br><br>Poa1p-like Appr-1"-p processing protein [ <i>Bacillus</i> phage Izhevsk]<br><br>Appr-1-p processing-like protein [ <i>Geobacillus</i> virus E3] | 5.0e-55<br><br>9.0e-54<br><br>9.0e-42 | Macro_Poa1p-like (1-144) | 1.54e-19 | COG2110; YmdB; O-acetyl-ADP-ribose deacetylase (regulator of RNase III), contains Macro domain [Translation, ribosomal structure (99.74/4.40e-16)<br><br>cd03331; Macro_Poa1p_like_SNF2; Macro domain, Poa1p_like family, SNF2 subfamily. The macro domain is a high-affinity ADP-ribose b(99.75/1.40e-15)<br><br>d1yd9a1; c.50.1.2 (A:6-193) Histone macro-H2a1.1 {Norway rat ( <i>Rattus norvegicus</i> ) [TaxId: 10116]} (99.73/1.70e-15) | macro domain containing protein |
| 159 | 115225 | 115040 | - | hp                                                                                                                                                                                                                  | hp                                    | -                        | -        | PF10925.9; DUF2680; Protein of unknown function (DUF2680) (92.99/1.10e+00)                                                                                                                                                                                                                                                                                                                                                                   | hp                              |
| 160 | 115608 | 115237 | - | hp                                                                                                                                                                                                                  | hp                                    | -                        | -        | PF03961.14; FapA; Flagellar Assembly Protein A(95.27/2.00e-01)                                                                                                                                                                                                                                                                                                                                                                               | hp                              |



|     |        |        |   |                                                                                                                                                                                                                                                                                           |                                        |                                                               |                                          |                                                                                                                                                                                                                                                                                                                                                                                                                                |                                                    |
|-----|--------|--------|---|-------------------------------------------------------------------------------------------------------------------------------------------------------------------------------------------------------------------------------------------------------------------------------------------|----------------------------------------|---------------------------------------------------------------|------------------------------------------|--------------------------------------------------------------------------------------------------------------------------------------------------------------------------------------------------------------------------------------------------------------------------------------------------------------------------------------------------------------------------------------------------------------------------------|----------------------------------------------------|
| 161 | 116095 | 115610 | - | hp                                                                                                                                                                                                                                                                                        | hp                                     | -                                                             | -                                        | ('-', '-')                                                                                                                                                                                                                                                                                                                                                                                                                     | hp                                                 |
| 162 | 116350 | 116126 | - | hp                                                                                                                                                                                                                                                                                        | hp                                     | -                                                             | -                                        | PF11446.9; DUF2897; Protein of unknown function (DUF2897) (94.44/3.30e-01)                                                                                                                                                                                                                                                                                                                                                     | hp                                                 |
| 163 | 117123 | 116347 | - | SpoT-like bifunctional (p)ppGpp synthase/hydrolase [ <i>Bacillus</i> phage Izhevsk]<br><br>GTP pyrophosphokinase [ <i>Bacillus</i> phage vB_BcoS-136]<br><br>GTP pyrophosphokinase [ <i>Bacillus</i> phage pW2]                                                                           | 3.0e-100<br><br>2.0e-90<br><br>8.0e-90 | spoT_reIA(38-167)<br><br>PRK11092(34-167)<br><br>SpoT(24-167) | 3.95e-14<br><br>8.61e-14<br><br>5.62e-13 | KOG1157; Predicted guanosine polyphosphate pyrophosphohydrolase/synthase [Signal transduction mechanisms] (100.0/3.30e-35)<br><br>COG0317; SpoT; (p)ppGpp synthase/hydrolase, HD superfamily [Signal transduction mechanisms, Transcription]. (100.0/9.00e-35)<br><br>d1vj7a1; a.211.1.1 (A:5-196) Stringent response-like protein RelA N-terminal domain { <i>Streptococcus equisimilis</i> [TaxId: 119602]} (99.97/8.80e-30) | SpoT-like bifunctional (p)ppGpp synthase/hydrolase |
| 164 | 118916 | 117231 | - | single-stranded-DNA-specific exonuclease RecJ [ <i>Bacillus</i> phage PBC2]<br><br>RecJ-type single-stranded DNA-specific exonuclease [ <i>Bacillus</i> phage Izhevsk]<br><br>putative SPBc2 prophage-derived single-strand DNA-specific exonuclease [ <i>Bacillus</i> phage vB_BcoS-136] | 0.0e+00<br><br>0.0e+00<br><br>0.0e+00  | recJ (19-556)<br><br>RecJ (43-458)<br><br>PRK11070 (1-424)    | 1.04e-83<br><br>2.05e-63<br><br>3.35e-39 | COG0608; RecJ; Single-stranded DNA-specific exonuclease, DHH superfamily, may be involved in archaeal DNA replication initiation [(100.0/4.70e-53)<br><br>d1ir6a_; c.107.1.2 (A:) Exonuclease RecJ { <i>Thermus thermophilus</i> [TaxId: 274]} (100.0/2.40e-40)<br><br>COG1107; COG1107; Archaea-specific RecJ-like exonuclease, contains DnaJ-type Zn finger domain [Replication, recombination and rep (100.0/4.70e-34)      | RecJ-type single-stranded DNA-specific exonuclease |
| 165 | 119579 | 119337 | - | hp                                                                                                                                                                                                                                                                                        | hp                                     | -                                                             | -                                        | ('-', '-')                                                                                                                                                                                                                                                                                                                                                                                                                     | hp                                                 |

| 166 | 120158 | 119679 | - | hp                                                                                                                                                                                                                  | hp                                             | -                                                                  | -                                               | ('-', '-')                                                                                                                                                                                                                                                                                                                                                                    | hp                             |
|-----|--------|--------|---|---------------------------------------------------------------------------------------------------------------------------------------------------------------------------------------------------------------------|------------------------------------------------|--------------------------------------------------------------------|-------------------------------------------------|-------------------------------------------------------------------------------------------------------------------------------------------------------------------------------------------------------------------------------------------------------------------------------------------------------------------------------------------------------------------------------|--------------------------------|
| 167 | 121349 | 120246 | - | <p>putative DNA primase [<i>Bacillus</i> phage PBC2]</p> <p>DNA primase [<i>Bacillus</i> phage vB_BcoS-136]</p> <p>DNA primase [<i>Bacillus</i> phage pW2]</p>                                                      | <p>0.0e+00</p> <p>6.0e-175</p> <p>9.0e-146</p> | <p>PRK08624 (9-298)</p> <p>DnaG (153-297)</p> <p>dnaG (83-297)</p> | <p>8.52e-22</p> <p>4.04e-08</p> <p>2.01e-07</p> | <p>COG0358; DnaG; DNA primase (bacterial type) [Replication, recombination and repair]. (100.0/1.90e-32)</p> <p>d1dd9a_; e.13.1.1 (A:) DNA primase DnaG catalytic core {<i>Escherichia coli</i> [TaxId: 562]} (99.91/3.70e-22)</p> <p>COG4643; COG4643; Uncharacterized domain associated with phage/plasmid primase [Mobilome: prophages, transposons]. (99.88/4.30e-21)</p> | DNA primase                    |
| 168 | 122892 | 121360 | - | <p>putative replicative DNA helicase [<i>Bacillus</i> phage PBC2]</p> <p>replicative DNA helicase [<i>Bacillus</i> phage vB_BcoS-136]</p> <p>DnaB-type replicative DNA helicase [<i>Bacillus</i> phage Izhevsk]</p> | <p>0.0e+00</p> <p>0.0e+00</p> <p>0.0e+00</p>   | <p>DnaB (59-307)</p>                                               | <p>1.84e-08</p>                                 | <p>COG0305; DnaB; Replicative DNA helicase [Replication, recombination and repair]. (100.0/1.80e-36)</p> <p>d1cr1a_; c.37.1.11 (A:) Gene 4 protein (g4p, DNA primase), helicase domain {Bacteriophage T7 [TaxId: 10760]} (99.92/5.80e-23)</p> <p>PF03796.16; DnaB_C; DnaB-like helicase C terminal domain(99.9/6.50e-21)</p>                                                  | DnaB-type replicative helicase |
| 169 | 123513 | 122908 | - | hp                                                                                                                                                                                                                  | hp                                             | -                                                                  | -                                               | d1imla1; g.39.1.3 (A:1-28) Cysteine-rich (intestinal) protein, CRP, CRIP {Rat ( <i>Rattus rattus</i> ) [TaxId: 10117]} (92.91/7.90e-02)                                                                                                                                                                                                                                       | hp                             |
| 170 | 124143 | 123613 | - | <p>deoxynucleoside kinase [<i>Bacillus</i> phage PBC2]</p> <p>deoxyribonucleoside kinase [<i>Bacillus</i> phage Izhevsk]</p>                                                                                        | <p>1.0e-87</p> <p>4.0e-87</p>                  | <p>Tmk (1-136)</p> <p>dNK (2-117)</p>                              | <p>4.30e-10</p> <p>2.82e-09</p>                 | <p>d1tmka_; c.37.1.1 (A:) Thymidylate kinase {Baker's yeast (<i>Saccharomyces cerevisiae</i>) [TaxId: 4932]} (99.76/1.60e-16)</p>                                                                                                                                                                                                                                             | thymidylate kinase             |

|     |        |        |   |                                                                                                                                                                                                            |                                         |                                                                                       |                                          |                                                                                                                                                                                                                                                                                                                                                                                                                                                                                                                              |                                                           |
|-----|--------|--------|---|------------------------------------------------------------------------------------------------------------------------------------------------------------------------------------------------------------|-----------------------------------------|---------------------------------------------------------------------------------------|------------------------------------------|------------------------------------------------------------------------------------------------------------------------------------------------------------------------------------------------------------------------------------------------------------------------------------------------------------------------------------------------------------------------------------------------------------------------------------------------------------------------------------------------------------------------------|-----------------------------------------------------------|
|     |        |        |   | putative nucleotide kinase<br>[ <i>Bacillus</i> phage phi3Ts]                                                                                                                                              | 4.0e-32                                 | AAA_18<br>(3-122)<br><br>DTMP_kinase<br>(1-151)                                       | 5.45e-07<br><br>4.48e-05                 | cd01672; TMPK; Thymidine<br>monophosphate kinase (TMPK), also<br>known as thymidylate kinase, catalyzes the<br>phosphorylation of thymidin(99.73/1.90e-<br>15)<br><br>d4tmka_; c.37.1.1 (A:) Thymidylate kinase<br>{ <i>Escherichia coli</i> [TaxId: 562]]<br>(99.69/1.20e-14)                                                                                                                                                                                                                                               |                                                           |
| 171 | 124899 | 124156 | - | 3D domain-containing protein<br>[ <i>Bacillus</i> phage Izhevsk]<br><br>cell wall-binding protein<br>[ <i>Bacillus</i> phage pW2]<br><br>cell-wall binding protein<br>[ <i>Bacillus</i> phage 0305phi8-36] | 2.0e-139<br><br>4.0e-120<br><br>9.0e-39 | 3D_containing_prot<br>eins<br>(150-247)<br><br>3D<br>(189-247)<br><br>MAD<br>(28-136) | 1.62e-36<br><br>4.98e-18<br><br>9.04e-06 | COG4942; EnvC; Septal ring factor EnvC,<br>activator of murein hydrolases AmiA and<br>AmiB [Cell cycle control, cell division,<br>chromosom] (99.72/5.30e-16)<br><br>COG3883; CwlO1; Uncharacterized N-<br>terminal domain of peptidoglycan<br>hydrolase CwlO [Function unknown].<br>(99.04/4.10e-08)<br><br>COG0739; NlpD; Murein DD-<br>endopeptidase MepM and murein<br>hydrolase activator NlpD, contain LysM<br>domain [Cell wall/membrane/envelope<br>(97.74/9.80e-06)<br>PF06725.12; 3D; 3D domain (98.2/2.3e-<br>05) | 3D domain-containing<br>protein                           |
| 172 | 126085 | 124976 | - | p-loop containing nucleoside<br>triphosphate hydrolase<br>[ <i>Bacillus</i> phage PBC2]<br><br>nucleotide-binding protein<br>[ <i>Bacillus</i> phage Izhevsk]                                              | 0.0e+00<br><br>2.0e-162                 | AAA_24<br>(21-244)                                                                    | 1.82e-24                                 | PF13479.7; AAA_24; AAA domain<br>(99.8/2.20e-17)<br><br>d3l1daa2; c.37.1.11 (A:145-396) DNA<br>repair protein Rad51, catalytic domain<br>{Baker's yeast ( <i>Saccharomyces cerevisiae</i> )<br>[TaxId: 4932] (99.36/2.80e-11)                                                                                                                                                                                                                                                                                                | P-loop containing<br>nucleoside<br>triphosphate hydrolase |

|     |        |        |   |                                                                                                                                                                                                                                         |                                          |                             |          |                                                                                                                                                                                                                                                                                                                                           |                                               |
|-----|--------|--------|---|-----------------------------------------------------------------------------------------------------------------------------------------------------------------------------------------------------------------------------------------|------------------------------------------|-----------------------------|----------|-------------------------------------------------------------------------------------------------------------------------------------------------------------------------------------------------------------------------------------------------------------------------------------------------------------------------------------------|-----------------------------------------------|
|     |        |        |   | p-loop containing nucleoside triphosphate hydrolase [ <i>Bacillus</i> phage pW2]                                                                                                                                                        | 1.0e-151                                 |                             |          | d1xp8a1; c.37.1.11 (A:15-282) RecA protein, ATPase-domain { <i>Deinococcus radiodurans</i> [TaxId: 1299]} (99.31/2.90e-11)                                                                                                                                                                                                                |                                               |
| 173 | 127376 | 126234 | - | putative single-stranded DNA binding protein [ <i>Bacillus</i> phage PBC2]<br><br>single-stranded DNA-binding protein [ <i>Bacillus</i> phage Izhevsk]<br><br>putative single-stranded DNA binding protein [ <i>Bacillus</i> phage pW2] | 5.0e-180<br><br>2.0e-111<br><br>1.0e-102 | -                           | -        | d1qvca_; b.40.4.3 (A:) ssDNA-binding protein { <i>Escherichia coli</i> [TaxId: 562]} (96.87/8.10e-02)                                                                                                                                                                                                                                     | ssDNA-binding protein                         |
| 174 | 127874 | 127497 | - | hp                                                                                                                                                                                                                                      | hp                                       | -                           | -        | ('-', '-')                                                                                                                                                                                                                                                                                                                                | hp                                            |
| 175 | 128011 | 127889 | - | -                                                                                                                                                                                                                                       | -                                        | -                           | -        | ('-', '-')                                                                                                                                                                                                                                                                                                                                | hp                                            |
| 176 | 128258 | 127992 | - | hp                                                                                                                                                                                                                                      | hp                                       | -                           | -        | d2icta_; a.35.1.3 (A:) Antitoxin HigA { <i>Escherichia coli</i> [TaxId: 562]} (98.98/1.60e-08)<br><br>COG5606; COG5606; Predicted DNA-binding protein, XRE-type HTH domain [General function prediction only]. (98.76/8.90e-08)<br><br>COG3655; YozG; DNA-binding transcriptional regulator, XRE family [Transcription]. (98.81/1.70e-07) | DNA-binding transcriptional regulator         |
| 177 | 129272 | 128274 | - | DNA breaking-rejoining enzyme [ <i>Bacillus</i> phage PBC2]                                                                                                                                                                             | 0.0e+00                                  | INT_ICEBs1_C_like (151-215) | 1.99e-04 | COG4973; XerC; Site-specific recombinase XerC [Replication,                                                                                                                                                                                                                                                                               | Xer family site-specific tyrosine recombinase |

|     |        |        |   |                                                                                                                                                            |                          |                  |          |                                                                                                                                                                                                                                                                |                                       |
|-----|--------|--------|---|------------------------------------------------------------------------------------------------------------------------------------------------------------|--------------------------|------------------|----------|----------------------------------------------------------------------------------------------------------------------------------------------------------------------------------------------------------------------------------------------------------------|---------------------------------------|
|     |        |        |   | DNA breaking-rejoining enzyme/site-specific recombinase [ <i>Bacillus</i> phage pW2]<br><br>site-specific recombinase [ <i>Bacillus</i> phage vB_BcoS-136] | 2.0e-158<br><br>3.0e-133 | XerC (32-245)    | 7.61e-04 | recombination and repair]. (99.98/1.70e-29)<br><br>COG4974; XerD; Site-specific recombinase XerD [Replication, recombination and repair]. (99.97/2.00e-28)<br><br>COG4342; COG4342; Intergase/Recombinase [Mobilome: prophages, transposons]. (99.89/1.40e-21) |                                       |
| 178 | 130099 | 129560 | - | putative signal peptide-containing lipoprotein [ <i>Bacillus</i> phage Izhevsk]                                                                            | 7.0e-25                  | -                | -        | PF08139.13; LPAM_1; Prokaryotic membrane lipoprotein lipid attachment site (97.25/4.70e-04)<br><br>PF16339.6; DUF4969; Domain of unknown function (DUF4969) (97.01/1.30e-03)<br><br>PF02402.17; Lysis_col; Lysis protein (96.93/1.60e-03)                      | signal peptide-containing lipoprotein |
| 179 | 130713 | 130216 | - | HepA-related protein [ <i>Bacillus</i> phage vB_BcoS-136]                                                                                                  | 8.0e-59                  | -                | -        | PF07443.14; HARP; HepA-related protein (HARP)(97.4/6.00e-04)                                                                                                                                                                                                   | hp                                    |
| 180 | 131154 | 130717 | - | hp                                                                                                                                                         | hp                       | PHA02264(68-142) | 3.59e-04 | PF14076.7; DUF4258; Domain of unknown function (DUF4258) (99.28/5.60e-11)<br><br>COG2929; COG2929; Uncharacterized conserved protein, DUF497 family [Function unknown]. (98.31/1.10e-05)                                                                       | hp                                    |

|     |        |        |   |    |    |   |   |                                                                                                                                                                                          |    |
|-----|--------|--------|---|----|----|---|---|------------------------------------------------------------------------------------------------------------------------------------------------------------------------------------------|----|
|     |        |        |   |    |    |   |   | PF04365.14; BrnT_toxin; Ribonuclease toxin, BrnT, of type II toxin-antitoxin system (97.46/3.30e-03)                                                                                     |    |
| 181 | 131561 | 131229 | - | hp | hp | - | - | PF14076.7; DUF4258; Domain of unknown function (DUF4258) (99.17/3.20e-10)<br><br>COG2929; COG2929; Uncharacterized conserved protein, DUF497 family [Function unknown]. (98.18/4.20e-05) | hp |
| 182 | 131935 | 131612 | - | -  | -  | - | - | ('-', '-')                                                                                                                                                                               | hp |
| 183 | 132430 | 131948 | - | -  | -  | - | - | PF09413.11; DUF2007; Putative prokaryotic signal transducing protein (79.22/7.30e+00)                                                                                                    | hp |
| 184 | 132666 | 132430 | - | hp | hp | - | - | ('-', '-')                                                                                                                                                                               | hp |
| 185 | 132920 | 132663 | - | -  | -  | - | - | ('-', '-')                                                                                                                                                                               | hp |
| 186 | 133326 | 132934 | - | -  | -  | - | - | ('-', '-')                                                                                                                                                                               | hp |
| 187 | 133546 | 133328 | - | hp | hp | - | - | PF02180.18; BH4; Bcl-2 homology region 4(84.51/1.70e+00)                                                                                                                                 | hp |
| 188 | 133808 | 133539 | - | hp | hp | - | - | ('-', '-')                                                                                                                                                                               | hp |
| 189 | 133993 | 133820 | - | -  | -  | - | - | cd17067; RBD2_RGS12_like; Ras-binding domain (RBD) 2 of regulator of G protein signaling 12 (RGS12) and similar proteins. (69.87/7.40e+00)                                               | hp |
| 190 | 134363 | 133998 | - | -  | -  | - | - | ('-', '-')                                                                                                                                                                               | hp |
| 191 | 134604 | 134368 | - | hp | hp | - | - | PF05952.13; ComX; <i>Bacillus</i> competence pheromone ComX(84.84/7.90e-01)                                                                                                              | hp |
| 192 | 134741 | 134631 | - | -  | -  | - | - | COG1309; AcrR; DNA-binding transcriptional regulator, AcrR family [Transcription]. (68.22/2.70e+00)                                                                                      | hp |
| 193 | 134965 | 134774 | - | hp | hp | - | - | ('-', '-')                                                                                                                                                                               | hp |

|     |        |        |   |                                                                                                                                                                     |                               |              |          |                                                                                                                                                                                                                                            |                                     |
|-----|--------|--------|---|---------------------------------------------------------------------------------------------------------------------------------------------------------------------|-------------------------------|--------------|----------|--------------------------------------------------------------------------------------------------------------------------------------------------------------------------------------------------------------------------------------------|-------------------------------------|
| 194 | 135182 | 134967 | - | hp                                                                                                                                                                  | hp                            | -            | -        | PF12119.9; DUF3581; Protein of unknown function (DUF3581) (65.33/6.30e+00)                                                                                                                                                                 | hp                                  |
| 195 | 135307 | 135179 | - | -                                                                                                                                                                   | -                             | -            | -        | PF03811.14; Zn_Tnp_IS1; InsA N-terminal domain (99.07/8.10e-10)<br><br>COG3877; COG3877; Uncharacterized protein, DUF2089 family [Function unknown]. (98.52/3.10e-07)<br><br>PF13717.7; zinc_ribbon_4; zinc-ribbon domain (98.43/9.50e-07) | Zn-ribbon domain containing protein |
| 196 | 135645 | 135307 | - | hp                                                                                                                                                                  | hp                            | YdjO(56-108) | 1.07e-04 | PF09629.11; YorP; YorP protein (97.86/5.60e-05)<br><br>d2l8da1; b.34.9.1 (A:5-66) Lamin-b receptor {Chicken (Gallus gallus) [TaxId: 9031]} (97.32/4.70e-03)<br><br>PF06442.12; DHFR_2; R67 dihydrofolate reductase (96.55/1.70e-02)        | hp                                  |
| 197 | 136072 | 135647 | - | gp248 [ <i>Bacillus</i> virus G]<br><br>ORF 8 [ <i>Haloarcula hispanica</i> virus SH1]<br><br>putative protein 3 [ <i>Haloarcula hispanica</i> icosahedral virus 2] | 7.0e-72<br>2.0e-14<br>2.0e-13 | -            | -        | ('-', '-')<br><br>PF07563.12; DUF1541; Protein of unknown function (DUF1541) (64.02/2.70e+00)                                                                                                                                              | hp                                  |
| 198 | 136244 | 136074 | - | -                                                                                                                                                                   | -                             | -            | -        | PF07563.12; DUF1541; Protein of unknown function (DUF1541) (64.02/2.70e+00)                                                                                                                                                                | hp                                  |

|     |        |        |   |                                                                                                                                                    |          |                                                   |                          |                                                                                                                                                            |                                                                             |
|-----|--------|--------|---|----------------------------------------------------------------------------------------------------------------------------------------------------|----------|---------------------------------------------------|--------------------------|------------------------------------------------------------------------------------------------------------------------------------------------------------|-----------------------------------------------------------------------------|
| 199 | 136443 | 136249 | - | -                                                                                                                                                  | -        | -                                                 | -                        | PF12660.8; zf-TFIIIC; Putative zinc-finger of transcription factor IIIC complex (72.71/2.50e+00)                                                           | hp                                                                          |
| 200 | 136787 | 136440 | - | hp                                                                                                                                                 | hp       | -                                                 | -                        | ('-', '-')                                                                                                                                                 | hp                                                                          |
| 201 | 137956 | 136928 | - | nicotinamide-nucleotide adenylyltransferase [ <i>Bacillus</i> phage PBC2]                                                                          | 0.0e+00  | PRK08099 (1-341)                                  | 1.16e-79                 | d1lw7a1; c.26.1.3 (A:57-219) Transcriptional regulator NadR, NMN-adenylyltransferase domain { <i>Haemophilus influenzae</i> [TaxId: 727]} (99.83/4.90e-19) | nicotinamide-nucleotide adenylyltransferase/ribosylnicotinamide kinase NadR |
|     |        |        |   | NadR type nicotinamide-nucleotide adenylyltransferase [ <i>Bacillus</i> phage Izhevsk]                                                             | 0.0e+00  | AAA_28 (170-328)                                  | 1.45e-41                 | cd02167; NMNAT_NadR; Nicotinamide/nicotinate mononucleotide adenylyltransferase of bifunctional NadR-like proteins. (99.76/1.50e-17)                       |                                                                             |
|     |        |        |   | multifunctional transcriptional regulator/nicotinamide-nucleotide adenylyltransferase/ribosylnicotinamide kinase NadR [ <i>Bacillus</i> phage pW2] | 0.0e+00  | NMNAT_NadR (5-164)                                | 4.36e-23                 | COG0196; RibF; FAD synthase [Coenzyme transport and metabolism]. (99.67/5.70e-16)                                                                          |                                                                             |
| 202 | 138645 | 137956 | - | nicotinamide mononucleotide transporter [ <i>Bacillus</i> phage PBC2]                                                                              | 5.0e-149 | NMN_transporter (33-220)<br><br>PRK15397 (40-188) | 8.36e-42<br><br>5.67e-14 | COG3201; PnuC; Nicotinamide riboside transporter PnuC [Coenzyme transport and metabolism]. (100.0/3.80e-38)                                                | PnuC-like nicotinamide mononucleotide transporter                           |
|     |        |        |   | PnuC-like nicotinamide mononucleotide transporter [ <i>Bacillus</i> phage Izhevsk]                                                                 | 3.0e-124 |                                                   |                          | PF04973.13; NMN_transporter; Nicotinamide mononucleotide transporter (100.0/1.90e-33)                                                                      |                                                                             |
|     |        |        |   | nicotinamide mononucleotide transporter [ <i>Bacillus</i> phage pW2]                                                                               | 5.0e-103 |                                                   |                          | PF04973.13; NMN_transporter; Nicotinamide mononucleotide transporter (98.54/5.20e-07)                                                                      |                                                                             |
| 203 | 138925 | 138764 | - | hp                                                                                                                                                 | hp       | -                                                 | -                        | ('-', '-')                                                                                                                                                 | hp                                                                          |
| 204 | 139139 | 138909 | - | hp                                                                                                                                                 | hp       | -                                                 | -                        | ('-', '-')                                                                                                                                                 | hp                                                                          |
| 205 | 139499 | 139317 | - | hp                                                                                                                                                 | hp       | -                                                 | -                        | PF18073.2; Rubredoxin_2; Rubredoxin metal binding domain (98.13/3.00e-06)                                                                                  | Zn-ribbon containing protein                                                |



|     |        |        |   |                                                                                                                                                                                                      |                                        |                         |          |                                                                                                                                                                                                                                                                                                                                                                                                                                      |                                        |
|-----|--------|--------|---|------------------------------------------------------------------------------------------------------------------------------------------------------------------------------------------------------|----------------------------------------|-------------------------|----------|--------------------------------------------------------------------------------------------------------------------------------------------------------------------------------------------------------------------------------------------------------------------------------------------------------------------------------------------------------------------------------------------------------------------------------------|----------------------------------------|
|     |        |        |   |                                                                                                                                                                                                      |                                        |                         |          | d1twfl_; g.41.9.2 (L:) RBP12 subunit of RNA polymerase II {Baker's yeast ( <i>Saccharomyces cerevisiae</i> ) [TaxId: 4932]} (98.21/3.40e-06)<br><br>cd00601; RNA_pol_P_RPB12; Eukaryotic RNA polymerases RPB12 subunit. RNA polymerases are multisubunit enzymes that synthesize RNA (98.09/8.60e-06)                                                                                                                                |                                        |
| 206 | 139741 | 139553 | - | hp                                                                                                                                                                                                   | hp                                     | -                       | -        | d1qy5a_; d.122.1.1 (A:) HSP90 {Dog ( <i>Canis familiaris</i> ) [TaxId: 9615]} (87.58/2.70e+00)                                                                                                                                                                                                                                                                                                                                       | hp                                     |
| 207 | 139967 | 139743 | - | hp                                                                                                                                                                                                   | hp                                     | -                       | -        | ('-', '-')                                                                                                                                                                                                                                                                                                                                                                                                                           | hp                                     |
| 208 | 140403 | 139972 | - | putative methyltransferase type 11 [ <i>Bacillus</i> phage PBC2]<br><br>putative methyltransferase type 11 [ <i>Bacillus</i> phage B4]<br><br>methyltransferase [ <i>Bacillus</i> phage Chotacabras] | 7.0e-100<br><br>2.0e-81<br><br>5.0e-80 | Methyltransf_25 (24-75) | 5.36e-10 | cd19250; AdoMet_MTase_I; class I SAM-binding methyltransferase. S-adenosylmethionine-dependent methyltransferases (SAM or AdoMet- (99.84/9.80e-20)<br><br>COG4627; COG4627; Predicted SAM-dependent methyltransferase [General function prediction only]. (99.81/2.10e-18)<br><br>cd02487; AdoMet_MTase_I; class I SAM-binding methyltransferase. S-adenosylmethionine-dependent methyltransferases (SAM or AdoMet- (99.81/2.30e-18) | SAM-depedendent methyltransferase      |
| 209 | 140678 | 140418 | - | hp                                                                                                                                                                                                   | hp                                     | -                       | -        | PF09133.11; SANTA; SANTA (SANT Associated) (78.2/2.20e+00)                                                                                                                                                                                                                                                                                                                                                                           | hp                                     |
| 210 | 140931 | 140659 | - | -                                                                                                                                                                                                    | -                                      | -                       | -        | d4pc3c1; a.5.2.2 (C:2-54) Elongation factor Ts (EF-Ts), N-terminal domain                                                                                                                                                                                                                                                                                                                                                            | putative translation elongation factor |

|     |        |        |   |    |    |   |   |                                                                                                                                                                                                                                                                                                                                                                                                                              |                                           |
|-----|--------|--------|---|----|----|---|---|------------------------------------------------------------------------------------------------------------------------------------------------------------------------------------------------------------------------------------------------------------------------------------------------------------------------------------------------------------------------------------------------------------------------------|-------------------------------------------|
|     |        |        |   |    |    |   |   | <p>{<i>Escherichia coli</i> [TaxId: 562]}<br/>(97.04/1.20e-03)</p> <p>cd14275; UBA_EF-Ts; UBA domain found in elongation factor Ts (EF-Ts) from bacteria, chloroplasts and mitochondria of eukaryotes. (96.92/2.10e-03)</p> <p>d1aipc1; a.5.2.2 (C:2-53) Elongation factor Ts (EF-Ts), N-terminal domain {<i>Thermus thermophilus</i> [TaxId: 274]} (96.79/2.60e-03)</p>                                                     |                                           |
| 211 | 141235 | 140987 | - | hp | hp | - | - | <p>COG1550; YlxP; Uncharacterized conserved protein YlxP, DUF503 family [Function unknown]. (72.88/6.00e+00)</p>                                                                                                                                                                                                                                                                                                             | hp                                        |
| 212 | 141431 | 141237 | - | hp | hp | - | - | <p>PF09868.10; DUF2095; Uncharacterized protein conserved in archaea (DUF2095) (88.72/6.60e-01)</p>                                                                                                                                                                                                                                                                                                                          | hp                                        |
| 213 | 141595 | 141446 | - | hp | hp | - | - | <p>d1cuka1; a.5.1.1 (A:156-203) DNA helicase RuvA subunit, C-terminal domain {<i>Escherichia coli</i> [TaxId: 562]} (96.27/2.30e-02)</p> <p>d1bvsa1; a.5.1.1 (A:148-203) DNA helicase RuvA subunit, C-terminal domain {<i>Mycobacterium leprae</i> [TaxId: 1769]} (96.27/3.30e-02)</p> <p>d1ixsa_; a.5.1.1 (A:) DNA helicase RuvA subunit, C-terminal domain {<i>Thermus thermophilus</i> [TaxId: 274]} (96.21/4.10e-02)</p> | RuvA C-terminal domain-containing protein |

|     |        |        |   |                                                      |         |   |   |                                                                                                                                                                                                         |                                       |
|-----|--------|--------|---|------------------------------------------------------|---------|---|---|---------------------------------------------------------------------------------------------------------------------------------------------------------------------------------------------------------|---------------------------------------|
| 214 | 141716 | 141624 | - | -                                                    | -       | - | - | PF13965.7; SID-1_RNA_chan; dsRNA-gated channel SID-1(65.68/5.20e+00)                                                                                                                                    | hp                                    |
| 215 | 142020 | 141745 | - | hp                                                   | hp      | - | - | COG4808; YehR; Uncharacterized lipoprotein YehR, DUF1307 family [Function unknown]. (97.33/4.40e-03)<br><br>PF08139.13; LPAM_1; Prokaryotic membrane lipoprotein lipid attachment site (94.38/6.50e-02) | signal peptide-containing lipoprotein |
| 216 | 142426 | 142025 | - | membrane-bound protein [Bacillus phage vB_BthM-Goe5] | 9.0e-44 | - | - | d1e0ta1; b.58.1.1 (A:70-167) Pyruvate kinase (PK) {Escherichia coli [TaxId: 562]} (88.45/1.70e+00)                                                                                                      | hp                                    |
| 217 | 142626 | 142423 | - | -                                                    | -       | - | - | ('-', '-')                                                                                                                                                                                              | hp                                    |
| 218 | 142882 | 142628 | - | hp                                                   | hp      | - | - | ('-', '-')                                                                                                                                                                                              | hp                                    |
| 219 | 143117 | 142884 | - | -                                                    | -       | - | - | ('-', '-')                                                                                                                                                                                              | hp                                    |
| 220 | 143502 | 143188 | - | hp                                                   | hp      | - | - | ('-', '-')                                                                                                                                                                                              | hp                                    |
| 221 | 143674 | 143507 | - | hp                                                   | hp      | - | - | ('-', '-')                                                                                                                                                                                              | hp                                    |
| 222 | 143883 | 143707 | - | -                                                    | -       | - | - | ('-', '-')                                                                                                                                                                                              | hp                                    |
| 223 | 144197 | 143970 | - | hp                                                   | hp      | - | - | ('-', '-')                                                                                                                                                                                              | hp                                    |
| 224 | 144439 | 144197 | - | -                                                    | -       | - | - | cd11629; HR1_FBP17; Protein kinase C-related kinase homology region 1 (HR1) Rho-binding domain of Formin Binding Protein 17. (91.86/2.00e+00)                                                           | hp                                    |
| 225 | 144599 | 144429 | - | -                                                    | -       | - | - | PF08509.12; Ad_cyc_g-alpha; Adenylate cyclase G-alpha binding domain (62.14/6.50e+00)                                                                                                                   | hp                                    |
| 226 | 144784 | 144611 | - | hp                                                   | hp      | - | - | ('-', '-')                                                                                                                                                                                              | hp                                    |
| 227 | 144973 | 144812 | - | -                                                    | -       | - | - | PF09104.11; BRCA-2_OB3; BRCA2, oligonucleotide/oligosaccharide-binding, domain 3(88.6/2.10e+00)                                                                                                         | hp                                    |
| 228 | 145306 | 144986 | - | hp                                                   | hp      | - | - | ('-', '-')                                                                                                                                                                                              | hp                                    |

|     |        |        |   |                                                                                                                                                               |                                       |                                |          |                                                                                                                                                                                                                                                                                            |                                                                |
|-----|--------|--------|---|---------------------------------------------------------------------------------------------------------------------------------------------------------------|---------------------------------------|--------------------------------|----------|--------------------------------------------------------------------------------------------------------------------------------------------------------------------------------------------------------------------------------------------------------------------------------------------|----------------------------------------------------------------|
| 229 | 145726 | 145403 | - | hp                                                                                                                                                            | hp                                    | -                              | -        | PF12824.8; MRP-L20; Mitochondrial ribosomal protein subunit L20(92.84/2.40e+00)                                                                                                                                                                                                            | hp                                                             |
| 230 | 146077 | 145790 | - | hp                                                                                                                                                            | hp                                    | -                              | -        | d1e0fi_; g.3.15.2 (I:) Haemadin {Indian leech ( <i>Haemadipsa sylvestris</i> ) [TaxId: 13555]} (89.11/2.50e-01)                                                                                                                                                                            | hp                                                             |
| 231 | 146271 | 146077 | - | hp                                                                                                                                                            | hp                                    | -                              | -        | ('-', '-')                                                                                                                                                                                                                                                                                 | hp                                                             |
| 232 | 146787 | 146356 | - | -                                                                                                                                                             | -                                     | -                              | -        | d1vq8t1; b.34.5.1 (T:1-119) Ribosomal proteins L24 (L24p) {Haloarcula marismortui [TaxId: 2238]} (85.33/2.60e+00)                                                                                                                                                                          | hp                                                             |
| 233 | 146918 | 146808 | - | -                                                                                                                                                             | -                                     | -                              | -        | PF05961.12; Chordopox_A13L; Chordopoxvirus A13L protein (92.83/3.20e-01)                                                                                                                                                                                                                   | hp                                                             |
| 234 | 147067 | 146921 | - | putative membrane protein [Bacillus phage vB_BceM_Bc431v3]                                                                                                    | 3.0e-23                               | -                              | -        | PF16286.6; DUF4932; Domain of unknown function (DUF4932) (83.78/1.10e+00)                                                                                                                                                                                                                  | hp                                                             |
| 235 | 147258 | 147064 | - | -                                                                                                                                                             | -                                     | -                              | -        | PF13299.7; CPSF100_C; Cleavage and polyadenylation factor 2 C-terminal (80.2/4.00e+00)                                                                                                                                                                                                     | hp                                                             |
| 236 | 147464 | 147291 | - | -                                                                                                                                                             | -                                     | -                              | -        | ('-', '-')                                                                                                                                                                                                                                                                                 | hp                                                             |
| 237 | 147633 | 147493 | - | -                                                                                                                                                             | -                                     | -                              | -        | ('-', '-')                                                                                                                                                                                                                                                                                 | hp                                                             |
| 238 | 147863 | 147630 | - | hp                                                                                                                                                            | hp                                    | -                              | -        | ('-', '-')                                                                                                                                                                                                                                                                                 | hp                                                             |
| 239 | 148360 | 147860 | - | nucleotide pyrophosphohydrolase [Bacillus phage Anthony]<br><br>putative hydrolase [Bacillus phage Bastille]<br><br>putative hydrolase [Bacillus phage Eyuki] | 3.0e-18<br><br>2.0e-17<br><br>5.0e-17 | NTP-PPase_Af0060_like (83-141) | 8.33e-10 | d1vmga_; a.204.1.2 (A:) Hypothetical protein SSo12199 (SSo3215) { <i>Sulfolobus solfataricus</i> [TaxId: 2287]} (99.17/8.80e-10)<br><br>cd11542; NTP-PPase_u5; Nucleoside Triphosphate Pyrophosphohydrolase (EC 3.6.1.8) MazG-like domain found in a group of uncharacter (99.08/4.10e-09) | MazG nucleotide pyrophosphohydrolase domain containing protein |

|     |        |        |   |                                      |         |   |   |                                                                                                                                                                                                                                                                                                                                                                                                                                                |                                           |
|-----|--------|--------|---|--------------------------------------|---------|---|---|------------------------------------------------------------------------------------------------------------------------------------------------------------------------------------------------------------------------------------------------------------------------------------------------------------------------------------------------------------------------------------------------------------------------------------------------|-------------------------------------------|
|     |        |        |   |                                      |         |   |   | cd11531; NTP-PPase_BsYpjD;<br>Nucleoside Triphosphate<br>Pyrophosphohydrolase (EC 3.6.1.8)<br>MazG-like domain putative<br>pyrophosphatase Yp (99.02/5.10e-09)                                                                                                                                                                                                                                                                                 |                                           |
| 240 | 148591 | 148391 | - | -                                    | -       | - | - | ('-', '-')                                                                                                                                                                                                                                                                                                                                                                                                                                     | hp                                        |
| 241 | 148779 | 148621 | - | -                                    | -       | - | - | ('-', '-')                                                                                                                                                                                                                                                                                                                                                                                                                                     | hp                                        |
| 242 | 149051 | 148785 | - | -                                    | -       | - | - | ('-', '-')                                                                                                                                                                                                                                                                                                                                                                                                                                     | hp                                        |
| 243 | 149304 | 149065 | - | gp183 [ <i>Bacillus</i> phage W.Ph.] | 5.0e-23 | - | - | ('-', '-')                                                                                                                                                                                                                                                                                                                                                                                                                                     | hp                                        |
| 244 | 149489 | 149331 | - | -                                    | -       | - | - | cd16347; VOC_like; uncharacterized<br>subfamily of the vicinal oxygen chelate<br>(VOC) family. (91.75/1.80e-01)                                                                                                                                                                                                                                                                                                                                | hp                                        |
| 245 | 149866 | 149570 | - | hp                                   | hp      | - | - | cd08058; MPN_euk_mb; Mpr1p, Pad1p<br>N-terminal (MPN) domains with catalytic<br>isopeptidase activity (metal-binding).<br>(77.04/1.90e+00)                                                                                                                                                                                                                                                                                                     | hp                                        |
| 246 | 150113 | 149955 | - | hp                                   | hp      | - | - | PF12273.9; RCR; Chitin synthesis<br>regulation, resistance to Congo red<br>(94.92/5.00e-02)                                                                                                                                                                                                                                                                                                                                                    | hp                                        |
| 247 | 150434 | 150114 | - | hp                                   | hp      | - | - | COG2182; MalE; Maltose-binding<br>periplasmic protein MalE [Carbohydrate<br>transport and metabolism]. (98.25/2.40e-<br>05)<br><br>COG1653; UgpB; ABC-type glycerol-3-<br>phosphate transport system, periplasmic<br>component [Carbohydrate transport and<br>metabolism]. (97.99/1.10e-04)<br><br>COG4150; CysP; ABC-type sulfate<br>transport system, periplasmic component<br>[Inorganic ion transport and metabolism].<br>(97.94/1.40e-04) | signal peptide-<br>containing lipoprotein |

|     |        |        |   |                                                                  |         |               |          |                                                                                                                                                                                                                                   |                                 |
|-----|--------|--------|---|------------------------------------------------------------------|---------|---------------|----------|-----------------------------------------------------------------------------------------------------------------------------------------------------------------------------------------------------------------------------------|---------------------------------|
| 248 | 150912 | 150436 | - | -                                                                | -       | -             | -        | ('-', '-')                                                                                                                                                                                                                        | hp                              |
| 249 | 151352 | 150990 | - | hp                                                               | hp      | -             | -        | ('-', '-')                                                                                                                                                                                                                        | hp                              |
| 250 | 151617 | 151354 | - | hp                                                               | hp      | -             | -        | PF18472.2; HP1451_C; HP1451 C-terminal domain (90.56/9.80e-01)                                                                                                                                                                    | hp                              |
| 251 | 151883 | 151641 | - | -                                                                | -       | -             | -        | d2gu3a2; d.17.1.6 (A:34-98)<br>Uncharacterized protein YpmB { <i>Bacillus subtilis</i> [TaxId: 1423]} (83.11/5.70e+00)                                                                                                            | hp                              |
| 252 | 152285 | 151947 | - | hp                                                               | hp      | -             | -        | PF11774.9; Lsr2; Lsr2(81.79/1.40e+00)                                                                                                                                                                                             | hp                              |
| 253 | 152596 | 152303 | - | -                                                                | -       | -             | -        | PF19150.1; DUF5832; Family of unknown function (DUF5832) (74.67/5.20e+00)                                                                                                                                                         | hp                              |
| 254 | 153077 | 152679 | - | putative peptidase [ <i>Bacillus</i> phage Izhevsk]              | 6.0e-69 | -             | -        | PF05379.12; Peptidase_C23; Carlavirus endopeptidase (96.71/1.30e-02)<br><br>PF05413.12; Peptidase_C34; Putative closterovirus papain-like endopeptidase (96.7/1.50e-02)                                                           | putative peptidase              |
| 255 | 153534 | 153091 | - | hp                                                               | hp      | -             | -        | PF14069.7; SpoVIF; Stage VI sporulation protein F(79.62/7.20e+00)                                                                                                                                                                 | hp                              |
| 256 | 153676 | 153551 | - | -                                                                | -       | -             | -        | d1je3a1; d.68.3.3 (A:21-97) hypothetical protein YedF (EC005) { <i>Escherichia coli</i> [TaxId: 562]} (80.14/1.80e+00)                                                                                                            | hp                              |
| 257 | 153928 | 153740 | - | hp                                                               | hp      | -             | -        | ('-', '-')                                                                                                                                                                                                                        | hp                              |
| 258 | 154168 | 154016 | - | hp                                                               | hp      | -             | -        | PF13121.7; DUF3976; Domain of unknown function (DUF3976) (80.95/4.20e+00)                                                                                                                                                         | hp                              |
| 259 | 155640 | 154270 | - | serine/threonine protein kinase [ <i>Bacillus</i> phage Izhevsk] | 2.0e-21 | SPS1 (46-178) | 1.77e-08 | cd05039; PTKc_Csk_like; Catalytic domain of C-terminal Src kinase-like Protein Tyrosine Kinases. PTKs catalyze the transfer of th(99.92/9.60e-24)<br><br>cd05148; PTKc_Srm_Brk; Catalytic domain of the Protein Tyrosine Kinases, | serine/threonine protein kinase |

|     |        |        |   |                                                         |         |   |   |                                                                                                                                                                                                                     |    |
|-----|--------|--------|---|---------------------------------------------------------|---------|---|---|---------------------------------------------------------------------------------------------------------------------------------------------------------------------------------------------------------------------|----|
|     |        |        |   |                                                         |         |   |   | Src-related kinase lacking C-terminal regulatory tyrosin (99.92/1.80e-23)<br><br>cd14158; STKc_IRAK4; Catalytic domain of the Serine/Threonine kinase, Interleukin-1 Receptor Associated Kinase 4. (99.91/3.00e-23) |    |
| 260 | 156477 | 156085 | - | hp                                                      | hp      | - | - | ('-', '-')                                                                                                                                                                                                          | hp |
| 261 | 156809 | 156531 | - | hp                                                      | hp      | - | - | ('-', '-')                                                                                                                                                                                                          | hp |
| 262 | 158429 | 158653 | + | -                                                       | -       | - | - | ('-', '-')                                                                                                                                                                                                          | hp |
| 263 | 158730 | 158972 | + | hp                                                      | hp      | - | - | ('-', '-')                                                                                                                                                                                                          | hp |
| 264 | 159056 | 159493 | + | hp                                                      | hp      | - | - | ('-', '-')                                                                                                                                                                                                          | hp |
| 265 | 159508 | 159624 | + | hp                                                      | hp      | - | - | ('-', '-')                                                                                                                                                                                                          | hp |
| 266 | 159670 | 160044 | + | hp                                                      | hp      | - | - | ('-', '-')                                                                                                                                                                                                          | hp |
| 267 | 160075 | 160656 | + | hp                                                      | hp      | - | - | ('-', '-')                                                                                                                                                                                                          | hp |
| 268 | 160752 | 161003 | + | gp175 [ <i>Bacillus</i> phage W.Ph.]                    | 2.0e-19 | - | - | PF02426.17; MIase; Muconolactone delta-isomerase (89.11/2.40e+00)                                                                                                                                                   | hp |
| 269 | 161075 | 161344 | + | hp                                                      | hp      | - | - | ('-', '-')                                                                                                                                                                                                          | hp |
| 270 | 161378 | 161545 | + | -                                                       | -       | - | - | cd19818; Bbox1_ZBBX; B-box-type 1 zinc finger found in zinc finger B-box domain-containing protein 1 (ZBBX) and similar proteins. (78.02/3.00e-01)                                                                  | hp |
| 271 | 161570 | 161767 | + | hp                                                      | hp      | - | - | PF07862.12; Nif11; Nif11 domain (78.25/5.80e+00)                                                                                                                                                                    | hp |
| 272 | 162292 | 162693 | + | -                                                       | -       | - | - | PF16270.6; DUF4923; Lipocalin-like domain (DUF4923) (87.2/3.20e+00)                                                                                                                                                 | hp |
| 273 | 162693 | 162851 | + | hp                                                      | hp      | - | - | PF16061.6; DUF4803; Domain of unknown function (DUF4803) (80.23/1.10e+00)                                                                                                                                           | hp |
| 274 | 162934 | 164007 | + | tail tape measure protein [ <i>Bacillus</i> phage PBC4] | 4.0e-08 | - | - | PF15843.6; DUF4719; Domain of unknown function (DUF4719) (69.65/6.70e+00)                                                                                                                                           | hp |

|     |        |        |   |                                                                                                                                                                             |                        |   |   |            |    |
|-----|--------|--------|---|-----------------------------------------------------------------------------------------------------------------------------------------------------------------------------|------------------------|---|---|------------|----|
|     |        |        |   | tail tape measure protein<br>[ <i>Bacillus</i> phage pW4]                                                                                                                   | 4.0e-06                |   |   |            |    |
|     |        |        |   | ubiquitin carboxyl-terminal<br>hydrolase [Mimivirus<br>LCMiAC02]                                                                                                            | 7.0e-06                |   |   |            |    |
| 275 | 164134 | 164904 | + | F-box and regulator of<br>chromosome condensation<br>repeat protein [Pithovirus<br>LCPAC102]<br><br>unknown similar to<br>AMEV033 [Mythimna<br>separata entomopoxvirus 'L'] | 2.0e-03<br><br>4.0e-03 | - | - | ('-', '-') | hp |



Table S4. tRNA genes of *Bacillus* phage *Kirovirus kirovense* Kirov.

| ORF№ | Start codon | Stop codon | Strand | Product  | Anticodon |
|------|-------------|------------|--------|----------|-----------|
| 1    | 19516       | 19590      | +      | tRNA-Asn | gtt       |
| 2    | 19596       | 19667      | +      | tRNA-Asp | gtc       |
| 3    | 19758       | 19828      | +      | tRNA-Gly | gcc       |
| 4    | 19945       | 20023      | +      | tRNA-Gln | ttg       |
| 5    | 20078       | 20148      | +      | tRNA-His | gtg       |

Table S5. *Kirovirus kirovense* Kirov and the most closely related phages.

| №  | Name                                    | Genome Accession number | Genome length | GC-content, % | CDSs | Number of tRNAs/tmRNAs | BLASTn nucleotide identity to Kirov, %* | Proteins shared with Kirov** |       |
|----|-----------------------------------------|-------------------------|---------------|---------------|------|------------------------|-----------------------------------------|------------------------------|-------|
|    |                                         |                         |               |               |      |                        |                                         | number                       | %     |
| 1  | <i>Bacillus</i> phage Kirov             | NC_071041               | 165,383       | 35.5          | 275  | 5/0                    | -                                       | -                            |       |
| 2  | <i>Bacillus</i> phage PBC2              | NC_071040               | 168,689       | 34.4          | 259  | 17/0                   | 60.3                                    | 154                          | 57.68 |
| 3  | <i>Bacillus</i> phage Izhevsk           | NC_071045               | 168,638       | 34.3          | 259  | 18/0                   | 45.2                                    | 138                          | 51.69 |
| 4  | <i>Bacillus</i> phage Diildio           | -                       | 171,148       | 34.3          | 267  | 18/0                   | 47.6                                    | 138                          | 50.92 |
| 5  | <i>Bacillus</i> phage vB_BanS-Tsamsa    | NC_023007               | 168,876       | 34.3          | 267  | 19/0                   | 45.8                                    | 137                          | 50.55 |
| 6  | <i>Bacillus</i> phage vB_BanS_MrDarsey  | NC_071047               | 164,998       | 34.2          | 245  | 17/0                   | 42.4                                    | 134                          | 51.54 |
| 7  | <i>Bacillus</i> phage vB_BanS_Chewbecca | NC_071048               | 161,151       | 34.3          | 237  | 20/0                   | 41.5                                    | 130                          | 50.78 |
| 8  | <i>Bacillus</i> phage vB_BanS_Nate      | NC_071044               | 166,879       | 33.6          | 264  | 16/0                   | 39.2                                    | 131                          | 48.60 |
| 9  | <i>Bacillus</i> phage vB_BanS_Sophrita  | NC_071042               | 167,995       | 32.4          | 259  | 4/0                    | 37.2                                    | 118                          | 44.20 |
| 10 | <i>Bacillus</i> phage pW2               | NC_071043               | 160,627       | 32.5          | 254  | 4/0                    | 36.5                                    | 120                          | 45.40 |
| 11 | <i>Bacillus</i> phage vB_BcoS-136       | NC_071049               | 160,590       | 32.2          | 241  | 18/0                   | 26.9                                    | 97                           | 37.60 |
| 12 | <i>Bacillus</i> phage vB_BsuS_PJN02     | NC_071050               | 165,868       | 33.6          | 230  | 13/0                   | 23.9                                    | 84                           | 33.27 |
| 13 | <i>Geobacillus</i> virus E3             | NC_029073               | 141,298       | 29.6          | 224  | 0/0                    | 13.3                                    | 32                           | 12.83 |
| 14 | <i>Bacillus</i> phage TsarBomba         | NC_028890               | 162,486       | 40.1          | 248  | 19/0                   | 7.9                                     | 15                           | 5.74  |
| 15 | <i>Bacillus</i> phage BCU4              | NC_047735               | 154,371       | 39.9          | 225  | 19/0                   | 7.6                                     | 14                           | 5.60  |
| 16 | <i>Bacillus</i> phage BCPST             | NC_070845               | 81,528        | 33.9          | 132  | 2/0                    | 6.6                                     | 12                           | 5.90  |
| 17 | <i>Bacillus</i> phage PBC4              | NC_070843               | 80,647        | 34.0          | 126  | 2/0                    | 6.6                                     | 12                           | 6.00  |
| 18 | <i>Bacillus</i> phage pW4               | NC_070844               | 80,919        | 34.0          | 133  | 2/0                    | 6.6                                     | 12                           | 5.88  |
| 19 | <i>Bacillus</i> phage Basilisk          | NC_070841               | 82,008        | 33.9          | 123  | 3/0                    | 6.6                                     | 13                           | 6.53  |
| 20 | <i>Bacillus</i> phage v_B-Bak10         | NC_070842               | 82,931        | 33.8          | 127  | 2/0                    | 6.6                                     | 13                           | 6.47  |
| 21 | <i>Bacillus</i> phage Slash             | NC_022774               | 80,382        | 35.2          | 111  | 0/0                    | 0                                       | 6                            | 3.11  |
| 22 | <i>Bacillus</i> phage Staley            | NC_022767               | 81,656        | 35.4          | 113  | 0/0                    | 0                                       | 6                            | 3.10  |

|    |                                 |           |         |      |     |     |   |    |      |
|----|---------------------------------|-----------|---------|------|-----|-----|---|----|------|
| 23 | <i>Bacillus</i> phage Stahl     | NC_028856 | 80,148  | 35.3 | 108 | 0/0 | 0 | 6  | 3.13 |
| 24 | <i>Bacillus</i> phage Stills    | NC_028777 | 80,798  | 35.5 | 107 | 0/0 | 0 | 6  | 3.14 |
| 25 | <i>Bacillus</i> phage Troll     | NC_022088 | 163,019 | 37.8 | 289 | 0/0 | 0 | 14 | 4.96 |
| 26 | <i>Bacillus</i> phage BigBertha | NC_022769 | 165,238 | 37.8 | 288 | 0/0 | 0 | 13 | 4.62 |
| 27 | <i>Bacillus</i> phage Bastille  | NC_018856 | 153,962 | 38.1 | 271 | 7/0 | 0 | 11 | 4.03 |
| 28 | <i>Bacillus</i> phage Evoli     | NC_024207 | 159,656 | 38.1 | 287 | 7/0 | 0 | 11 | 3.92 |
| 29 | <i>Bacillus</i> phage Spock     | NC_022763 | 164,297 | 37.6 | 281 | 0/0 | 0 | 14 | 5.04 |
| 30 | <i>Bacillus</i> phage B4        | NC_018863 | 162,596 | 37.7 | 285 | 0/0 | 0 | 13 | 4.64 |

\*Determined using BLASTn (multiplying % coverage by % identity); \*\*Determined using GET\_HOMOLOGUES (COGtriangles algorithm, -G -t 0 -C 75).

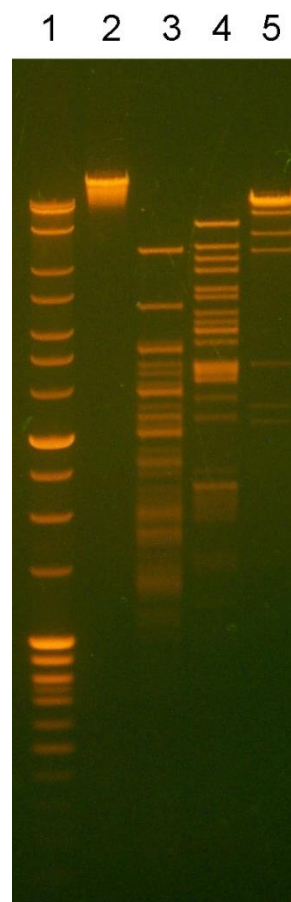

Figure S2. Restriction analysis of the phage genomic DNA. This is the original gel image used to generate Figure 2, A in the main text. Kodak EDAS 290 Gel Documentation System (“Kodak”) was used to capture the image. 1 – molecular weight markers; 2 – intact phage DNA, 3 – HindIII, 4 – XbaI, 5 – PacI.

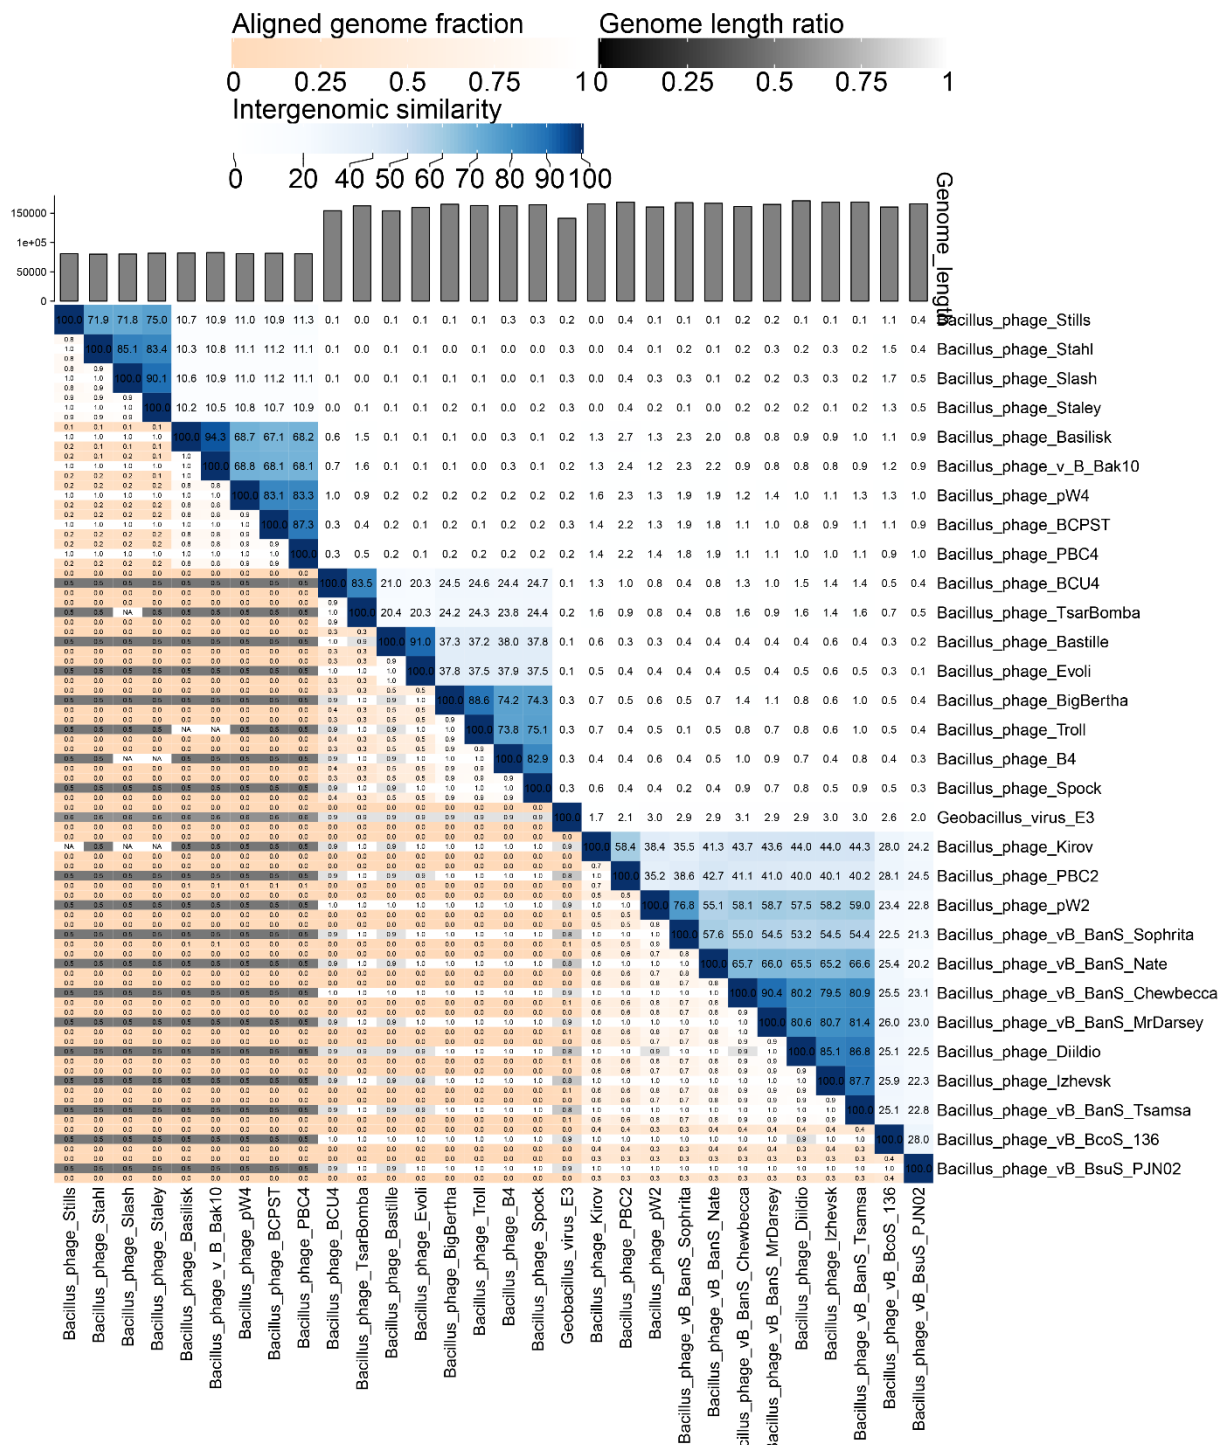

Figure S3. Heat map of 30 phage complete genome sequences generated by VIRIDIC. The right side of the figure displays intergenomic similarity between the 30 genomes using a blue gradient, where darker colors indicate a higher percentage of intergenomic similarity. In the left half, three different values are represented: the aligned genome fraction for the genome found in the row (top), genome length ratio (middle), and the aligned genome fraction for the genome found in the column (bottom). These values are ranked from 0 to 1, with 1 displayed in white.

Table S6. Reagent list.

| No. | Reagent                         | Company name, address (city, country)/ other information      |
|-----|---------------------------------|---------------------------------------------------------------|
| 1   | Acetic Acid                     | Kupavnareaktiv, Staraya Kupavna, Russia / chemically pure     |
| 2   | Agar                            | Dia-M, Moscow, Russia / bacteriology grade, Cat.No. 3346.0500 |
| 3   | Agarose                         | Bio-Rad, Richmond, CA, USA / standard electroendosmosis       |
| 4   | Gelatin                         | Difco laboratories, Detroit, MI, USA /                        |
| 5   | Glycine                         | SERVA, Heidelberg, Germany / analytical grade                 |
| 6   | Calcium Chloride                | Dalchempharm, Khabarovsk, Russia / pharm. grade               |
| 7   | Cesium Chloride                 | Reachim, Staraya Kupavna, Russia / high purity grade          |
| 8   | Magnesium Chloride              | Aldosa, Moscow, Russia / chemically pure                      |
| 9   | PEG 8000                        | PanReac AppliChem, Darmstadt, Germany / pharm. grade          |
| 10  | Hydrochloric Acid               | Kupavnareaktiv, Staraya Kupavna, Russia / chemically pure     |
| 11  | Magnesium Sulphate              | Labochem international, Einhausen, Germany / pharm. grade     |
| 12  | Sodium Acetate                  | PanReac, Darmstadt Germany / pharm. grade                     |
| 13  | Sodium Chloride                 | Kupavnareaktiv, Staraya Kupavna, Russia / chemically pure     |
| 14  | Sodium Hydroxide                | PanReac AppliChem, Darmstadt, Germany / pharm. grade          |
| 15  | Sodium Phosphate, dibasic       | PanReac, Darmstadt, Germany / pharm. grade                    |
| 16  | Sodium Phosphate, monobasic,    | PanReac, Darmstadt, Germany / pharm. grade                    |
| 17  | Resazurin dye                   | Dia-M, Moscow, Russia / Cat.No. 3606.0025                     |
| 18  | Tris(hydroxymethyl)aminomethane | Sigma, Burlington, Massachusetts, United States / BioXtra     |
| 19  | Trypton                         | Dia-M, Moscow, Russia / Cat.No. 3313.0500                     |
| 20  | Yeast Extract                   | Dia-M, Moscow, Russia / Cat.No. 3017.0500                     |
